## Analysis of meiosis in *Pristionchus pacificus* reveals plasticity in homolog pairing and synapsis within the nematode lineage

Regina Rillo-Bohn<sup>1,2,3,4</sup>, Renzo Adilardi<sup>1,2,3,4</sup>, Barış Avşaroğlu<sup>1,2,3,4</sup>, Lewis Stevens<sup>5</sup>, Simone Köhler<sup>1,2,3,4,6</sup>, Joshua Bayes<sup>1,2,3,4</sup>, Clara Wang<sup>1,2,3,4</sup>, Sabrina Lin<sup>1,2,3,4</sup>, Kayla Baskevitch<sup>1,2,3,4</sup>, Abby F. Dernburg<sup>1,2,3,4</sup>

<sup>1</sup>Department of Molecular and Cell Biology, University of California, Berkeley, Berkeley, CA United States; <sup>2</sup>Howard Hughes Medical Institute, Chevy Chase, MD United States; <sup>3</sup>Biological Systems and Engineering Division, Lawrence Berkeley National Laboratory, Berkeley, CA United States; <sup>4</sup>California Institute for Quantitative Biosciences, Berkeley, CA United States; <sup>5</sup>Institute of Evolutionary Biology, University of Edinburgh, Edinburgh, UK; <sup>6</sup>Cell Biology and Biophysics Unit, European Molecular Biology Laboratory, Heidelberg, Germany

### 1 ABSTRACT

2 The goal of meiosis is to produce haploid gametes from diploid progenitor cells. While meiosis was likely  
3 present in the last eukaryotic common ancestor (LECA), diversity in meiotic mechanisms has long been  
4 observed among sexually reproducing eukaryotes. Here we describe a new, comparative model system for  
5 molecular analysis of meiosis, the nematode *Pristionchus pacificus*, a distant relative of the widely  
6 studied model organism *Caenorhabditis elegans*. Despite superficial similarities in germline organization  
7 and meiotic progression between *P. pacificus* and *C. elegans*, we identify fundamental differences in the  
8 molecular mechanisms underlying homolog pairing, synapsis, and crossover regulation. Whereas *C.*  
9 *elegans* has lost the meiosis-specific recombinase Dmc1, *P. pacificus* expresses both DMC-1 and RAD-  
10 51, which localize sequentially to meiotic chromosomes during prophase. We find that *Ppa-spo-11* and  
11 *Ppa-dmc-1* are required for stable homolog pairing, synapsis, and crossover formation, while *Ppa-rad-51*  
12 is dispensable for these key processes during early prophase and plays a supporting role in meiotic  
13 double-strand break repair. Additionally, we show that elevated crossover recombination in *P. pacificus*  
14 likely arises through a Class II pathway normally inactive in *C. elegans*, shedding light on crossover  
15 control and the evolution of recombination rates.

16

17

18

## 19 INTRODUCTION

20 All sexually reproducing organisms rely on the specialized cell division process of meiosis to  
21 generate haploid gametes from diploid precursors. Upon fertilization, haploid gametes fuse and restore  
22 the diploid chromosome complement in the zygote. Thus, meiosis is essential for the survival of sexually  
23 reproducing species.

24 A defining feature of meiosis is a “reductional” segregation in which homologous chromosomes  
25 are separated, usually during the first of two nuclear divisions. A highly choreographed series of  
26 chromosome transactions precedes this division and ensures faithful homolog segregation: (1) pairing, in  
27 which chromosomes contact and recognize their homologous partners; (2) synapsis, defined as the  
28 assembly of a protein ensemble called the synaptonemal complex (SC) between homologs, which leads to  
29 their lengthwise alignment; and (3) crossover (CO) recombination, which creates physical linkages  
30 between chromosomes that promote proper bi-orientation during anaphase I. Failure to form at least a  
31 single CO between paired homologs results in nondisjunction and aneuploid gametes (Zickler and  
32 Kleckner, 1999).

33 Although pairing, synapsis and CO recombination are nearly ubiquitous among eukaryotes,  
34 details of these mechanisms show remarkable diversity among different lineages. In most model fungi,  
35 plants, and animals, stable homologous chromosome pairing and synapsis depend on early steps of the  
36 recombination pathway. Meiotic recombination is initiated by a conserved topoisomerase-like enzyme  
37 called Spo11, which catalyzes programmed DNA double-strand breaks (DSBs) across the genome, a  
38 subset of which are ultimately processed into COs (Keeney, 2008; Keeney et al., 1997). DSBs are  
39 resected to form 3' single-stranded DNA overhangs. Dmc1, a meiosis-specific recombinase, forms  
40 filaments along these ssDNA segments and promotes interhomolog strand invasion. Spo11-dependent  
41 induction of DSBs and Dmc1-dependent strand invasion are crucial for proper pairing and synapsis in the  
42 budding yeast *Saccharomyces cerevisiae*, the flowering plant *Arabidopsis thaliana*, and mammalian

43 model *Mus musculus* (Bishop et al., 1992; Couteau et al., 1999; Grelon, 2001; Pittman et al., 1998;  
44 Rockmill et al., 1995; Yoshida et al., 1998).

45 In contrast, recombination-independent mechanisms of pairing and synapsis have been  
46 characterized in other prominent model systems, including the dipteran *Drosophila melanogaster* and the  
47 nematode *Caenorhabditis elegans*. While recombination is essential for successful execution of meiosis  
48 in *C. elegans* and in female fruit flies, homolog pairing and synapsis can be uncoupled from early  
49 recombination events. During female meiosis in *D. melanogaster*, pairing initiates in proliferating  
50 germline stem cells before oocytes enter meiosis (Christophorou et al., 2013; Joyce et al., 2013; Rubin et  
51 al., 2016) and is stabilized by SC formation. *D. melanogaster* males lack recombination and SCs, and  
52 have apparently evolved a distinct mechanism to stabilize homolog pairing and enable reductional  
53 segregation (McKee et al., 2012). In *C. elegans*, pairing and synapsis are driven by Pairing Centers,  
54 specialized sites on each chromosome bound by a family of zinc-finger proteins that mediate nuclear  
55 envelope attachment and chromosome dynamics (MacQueen et al., 2005; Phillips et al., 2005; Phillips  
56 and Dernburg, 2006; Sato et al., 2009). While nuclear envelope attachment and chromosome movement  
57 play important roles in meiotic pairing and synapsis across eukaryotes, in *C. elegans* they have acquired a  
58 critical role in coupling homolog pairing to synapsis initiation (Penkner et al., 2009; Sato et al., 2009).

59 To investigate how the meiotic program is modified during evolution, we have established tools  
60 to investigate meiosis in the free-living nematode *Pristionchus pacificus*. Like its distant relative *C.*  
61 *elegans*, *P. pacificus* is an androdioecious species, characterized by a population of mostly self-fertilizing  
62 hermaphrodites (XX) and a low frequency of males (XO) (Sommer et al., 1996). Like *C. elegans*, *P.*  
63 *pacificus* has a short life cycle of 3.5 days, produces large broods of about 200 progeny by self-  
64 fertilization, and is easily cultured in the lab (Hong and Sommer, 2006). Although *C. elegans* and *P.*  
65 *pacificus* diverged an estimated 200-300 million years ago (Pires-daSilva, 2004), they share the same  
66 number of chromosomes ( $2n=12$ ) and, with the exception of one major chromosomal translocation,  
67 macrosynteny is maintained between the two species (Dieterich et al., 2008; Rödelsperger et al., 2017). *P.*  
68 *pacificus* has been established as a model for comparative studies in development, evolution and ecology

69 (Sommer, 2015). Recent improvements in the genome assembly (Rödelsperger et al., 2017) and advances  
70 in genome editing (Lo et al., 2013; Namai and Sugimoto, 2018; Witte et al., 2015) have facilitated  
71 investigation of cell biological processes at a more mechanistic level.

72 In addition to these general features that make *P. pacificus* a tractable model system, previous  
73 studies revealed interesting variations from *C. elegans*. First, genome sequencing revealed the presence of  
74 the Dmc1 gene, which is absent from the entire *Caenorhabditis* clade (Figure 2 - Supplement 1 and  
75 Dieterich et al., 2008). Loss of Dmc1 correlates with the adaptation of recombination-independent  
76 mechanisms for pairing and synapsis in *Drosophila* and *Caenorhabditis* (Villeneuve and Hillers, 2001).  
77 Therefore, it was of great interest to us to examine how homologous chromosomes pair and synapse in the  
78 presence of Dmc1. Second, genetic linkage maps have revealed that multiple crossovers typically occur  
79 per chromosome pair during meiosis in *P. pacificus* (Srinivasan et al., 2003, 2002). This is in striking  
80 contrast to *C. elegans*, which exhibits complete crossover interference; only a single Class I CO normally  
81 occurs per chromosome pair (Martinez-Perez and Colaiácovo, 2009). These observations suggest a major  
82 difference in the mechanism of crossover control between these two species.

83 By employing CRISPR/Cas9-mediated genome editing techniques, genetics,  
84 immunocytochemistry and microscopy, we describe here the early events of meiotic prophase in *P.*  
85 *pacificus*. We show that homolog pairing, synapsis and CO recombination are dependent on *Ppa-spo-11*  
86 and *Ppa-dmc-1*, while *Ppa-rad-51* is not essential for meiosis. We also provide evidence that a single  
87 Class I crossover occurs per homolog pair in *P. pacificus*, implying that the higher recombination rate is  
88 due to Class II crossovers. Our work establishes tools for future investigation and highlights the flexibility  
89 of the meiotic program within the nematode lineage.

90

## 91 **RESULTS**

### 92 ***P. pacificus* as a comparative model system for meiosis**

93 The morphology and organization of the *P. pacificus* germline is superficially very similar to that  
94 of *C. elegans*. Hermaphrodites have two gonad arms in which sperm and ova are produced sequentially,

95 while males have a single arm (Rudel et al., 2005). DAPI staining of adult hermaphrodite gonads reveals  
96 a cylindrical monolayer of cells; the distal tip is populated by proliferating germline stem cells (Figure  
97 1A-C). As germ cells enter meiosis, their nuclear morphology abruptly becomes asymmetrical, as the  
98 chromosome mass adopts a conspicuous, crescent-shaped morphology (Figure 1A). Immediately  
99 proximal to this “transition zone,” DAPI staining reveals parallel tracks, indicative of paired and synapsed  
100 homologous chromosomes in the pachytene stage. Oocyte chromosomes in *P. pacificus* undergo a  
101 dramatic decondensation between diplotene and diakinesis, a stage that has been referred to as the  
102 “growth zone” (Rudel et al., 2005) or “diffuse stage” (Zickler and Kleckner, 1999). Similar diffuse  
103 chromosome morphology is observed during late prophase in other eukaryotes, but is rarely seen in *C.*  
104 *elegans*. As oocytes mature in the proximal region of the hermaphrodite gonad, they form a single row of  
105 large cells, and chromosomes condense dramatically. Six bivalents can be detected as compact DAPI-  
106 staining bodies during diakinesis, the stage preceding the first meiotic division, during oogenesis (Figure  
107 1A, Sommer et al., 1996, Rudel et al., 2005).

108 It has been assumed that chromosomes in *P. pacificus* are holocentric, as in *C. elegans*, but we  
109 are unaware of direct evidence to support this idea. We thus identified a gene encoding CENP-C (*hcp-4* in  
110 *C. elegans*), a conserved kinetochore protein, in the *P. pacificus* genome and inserted a V5 epitope tag at  
111 its 3' end using CRISPR/Cas9. The appearance of mitotic chromosomes in embryos and in the premeiotic  
112 germline confirmed their holocentric organization (Figure 1C). Ppa-CENP-C::V5 forms linear structures,  
113 a hallmark of holocentric chromosomes, instead of discrete foci as observed for monocentric  
114 chromosomes.

115

## 116 **Stable homolog pairing requires early recombination factors**

117 BLAST searches of the *P. pacificus* genome revealed an open reading frame encoding an  
118 unambiguous ortholog of Dmc1, a meiosis-specific paralog of Rad51 (Table S1). An ortholog of the  
119 Dmc1 cofactor Mnd1 was also readily identified; although its partner Hop2 was not apparent among the  
120 predicted proteins or published nucleotide sequence (Figure 2 – Supplement 1). By contrast,

121 Dmc1/Mnd1/Hop2 are absent from both *C. elegans* and *D. melanogaster*, two model organisms that have  
122 evolved recombination-independent mechanisms of homolog pairing and synapsis (Villeneuve and  
123 Hillers, 2001). We analyzed the genome sequences of other nematodes to determine the evolutionary  
124 history of these genes within the nematode lineage (Bolt et al., 2018; <https://parasite.wormbase.org>). This  
125 analysis revealed that Dmc1/Mnd1/Hop2 have been lost several times during the evolution of nematodes,  
126 including the entire *Caenorhabditis* genus and all sequenced members of Clade IV (Figure 2 –  
127 Supplement 1). Not surprisingly in light of its essential function in DNA repair, the recombinase Rad51  
128 was detected in almost all genomes with the exception of *Haemonchus contortus*, *Parascaris univalens*  
129 and *Parascaris equorum* (data not shown). It is likely that the absence of Rad51 orthologs reflects  
130 incomplete genome assembly and/or annotation.

131 Our analysis also identified homologs of four related zinc finger proteins required for pairing  
132 center activity in *C. elegans* (HIM-8, ZIM-1, ZIM-2, and ZIM-3) in most of the genome sequences from  
133 Clade V. Thus, many species within this clade have genes encoding both pairing center proteins and  
134 Dmc1/Mnd1/Hop2, but *Caenorhabditids* have lost the latter while *Pristionchus* apparently diverged  
135 before the emergence of the former.

136 We tested whether homolog pairing in *P. pacificus* is dependent on these early recombination  
137 factors. To generate *spo-11*, *dmc-1* and *rad-51* null mutants, we employed TALEN-mediated gene  
138 disruption, and later CRISPR/Cas9 genome editing techniques (this study; Lo et al., 2013; Witte et al.,  
139 2015). Methods such as co-CRISPR that facilitate detection of genome editing events have not worked  
140 consistently in our hands (data not shown). Nevertheless, we were able to isolate mutant alleles by  
141 screening a large number of F1 progeny from injected hermaphrodites (see Materials and Methods).  
142 Independent alleles isolated from either TALEN or CRISPR-mediated genome editing resulted in  
143 identical mutant phenotypes. All data presented here were based on alleles generated by CRISPR/Cas9.  
144 Because balancer chromosomes are not currently available for *P. pacificus*, most mutations described  
145 here were maintained in unbalanced heterozygotes, which were identified by PCR-based genotyping.  
146 Self-fertilization of heterozygotes results in broods with 25% homozygous mutant animals.

147 As expected, disruption of either *spo-11* or *dmc-1* resulted in the detection of 12 DAPI-staining  
148 univalent chromosomes at diakinesis, indicative of a failure in CO recombination (Figure 5). Surprisingly,  
149 *rad-51* mutants showed only mild meiotic defects (see below), and we thus confirmed the loss of RAD-51  
150 function in mutant animals by generating multiple alleles, and confirming the absence of RAD-51 by  
151 immunofluorescence using a polyclonal antibody against Ppa-RAD-51 (Figure 4 – Supplement 1A, see  
152 Materials and Methods). Mutations in *spo-11* and *dmc-1*, but not *rad-51*, also resulted in an obvious  
153 extension of the region of the germline displaying the crescent-shaped nuclear morphology characteristic  
154 of early meiosis (Figure 2 – Supplement 2). A similar “extended transition zone” phenotype is seen in *C.*  
155 *elegans* mutants that fail to synapse their chromosomes during meiosis, suggesting that *spo-11* and *dmc-1*  
156 might be required for synapsis in *P. pacificus*.

157 To visualize and quantify homolog pairing, we generated FISH probes against two short tandem  
158 repeats found on Chromosome X and IV (Figure 2A). We measured the distance between pairs of  
159 homologous FISH signals in individual nuclei for each genotype. To analyze pairing kinetics, we divided  
160 the distal gonads into five zones of equal length. In zone 1, which mostly consists of proliferating germ  
161 cells, pairs of FISH signals remained far apart, with an average distance of  $2.4 \pm 1.0 \mu\text{m}$  (SD) and  $2.5 \pm$   
162  $0.8 \mu\text{m}$  for Chrom X and IV, respectively (Figure 2B, D). In zone 2, which spans the transition zone, the  
163 average distances decreased significantly in wild-type animals ( $1.2 \pm 1.1 \mu\text{m}$  and  $1.1 \pm 1.1 \mu\text{m}$  for Chrom  
164 X and IV, respectively), and homologous signals remained closely associated in the subsequent meiotic  
165 stages. Notably, homologous FISH probes localized closer together, on average, in the two zones  
166 immediately following meiotic entry, and showed some separation in zones 4 and 5 (Figure 2B, D). By  
167 contrast, in wild-type *C. elegans*, homologous loci remain closely apposed in most of the distal region of  
168 the gonad (MacQueen et al., 2002). Together with analysis of synapsis (below), this indicated that  
169 desynapsis initiates shortly after completion of synapsis in *P. pacificus*, resulting in partial separation of  
170 homologs.

171 We noted that the average distances between pairs of homologous FISH signals in *spo-11* and  
172 *dmc-1* mutants also decreased markedly upon meiotic entry, although clearly less so than in wild type

173 (Figure 2D). In contrast, *rad-51* mutants showed distributions of probe distances similar to wild-type  
174 animals (Figure 2C, D). We considered the possibility that the proximity between FISH signals might  
175 reflect the clustering of all chromosomes within a subregion of the nucleus, which is apparent during the  
176 “transition zone” (leptotene/zygotene), rather than specific homologous interactions. If so, the extended  
177 transition zone morphology in *spo-11* and *dmc-1* might obscure a pairing defect that would be more  
178 apparent in the absence of clustering (Figure 2 – Supplement 2). To address this, we measured the  
179 distances between pairs of heterologous FISH signals in the premeiotic region (dispersed) versus the  
180 transition zone (clustered). We observed that heterologous FISH signals were also significantly closer to  
181 each other in the transition zone compared to premeiotic nuclei in both wild-type and mutant animals  
182 (Figure 2E). Furthermore, the distances between heterologous versus homologous pairs of FISH loci were  
183 not significantly different in *spo-11* and *dmc-1* mutants ( $p=0.1777$  and  $p=0.6774$ , respectively, by  
184 Student’s *t*-test), but were clearly different in wild-type meiocytes ( $p<0.0001$  by Student’s *t*-test) (Figure  
185 2E). These data support the idea that clustering, rather than specific pairing, promote proximity between  
186 these loci during leptotene/zygotene in *spo-11* and *dmc-1* mutants. Although we cannot conclude that  
187 transient homologous pairing is absent in these mutants, it is evident that these early recombination  
188 factors are required for stable pairing and extended association of homologous loci throughout prophase.  
189 In contrast, *rad-51* is dispensable for homolog pairing, as in *C. elegans*.

190

### 191 **SPO-11 and DMC-1 are required for homologous synapsis**

192 To further investigate meiotic progression in *P. pacificus* and to probe the role of early  
193 recombination factors in synapsis, we developed cytological markers for the chromosome axis, which  
194 normally assembles upon meiotic entry, and the synaptonemal complex (SC), which assembles between  
195 paired axes during early prophase. Identification of a candidate axial element component was  
196 straightforward, due to the presence of the easily recognized HORMA (Hop1, Rev7, Mad2) domain  
197 among members of this family of proteins (Aravind and Koonin, 1998; Vader and Musacchio, 2014). We  
198 identified a gene encoding a HORMA domain protein that is most closely related to *Cel-him-3* by



199 reciprocal BLAST analysis (Table S1). We refer to this gene as *Ppa-hop-1*, after the founding member of  
200 the meiotic HORMA proteins, *S. cerevisiae* Hop1. We raised a polyclonal antibody by genetic  
201 immunization using a fragment that encodes a peptide of 100 amino acids in length, including part of the  
202 HORMA domain, and found that this antibody indeed recognized chromosome axes from meiotic entry  
203 through late pachytene.

204 To enable cytological detection of synaptonemal complex (SC) assembly, we searched for  
205 homologs of SC proteins. This is notoriously challenging due to rapid divergence of these proteins, and  
206 their extensive regions of coiled-coil potential, which is associated with a strongly skewed amino acid  
207 composition. *C. elegans* expresses four known SC proteins, known as SYP-1, SYP-2, SYP-3, and SYP-4  
208 (Colaiácovo et al., 2003; MacQueen et al., 2002; Smolikov et al., 2009, 2007). SYP-4 contains a  
209 distinctive C-terminal domain with several unusual motifs enriched in glycine and phenylalanine residues.  
210 We generated and sequenced an RNA library from isolated gonads, which facilitated identification of  
211 full-length *Ppa-syp-4*. We inserted an HA epitope tag at the C-terminus of the coding sequence via  
212 template-directed repair of a CRISPR/Cas9-induced break, and found that immunofluorescence with an  
213 epitope-specific antibody localized specifically between paired meiotic chromosomes, confirming SYP-4-  
214 HA as a marker for the SC (Figure 3A, B). The tagged protein supported normal meiosis, demonstrated  
215 by the low percentage of inviable embryos and males in the strain population (Figure 3 – Supplement 1).

216 HOP-1 was detected in the nucleoplasm in the premeiotic region of the germline and formed  
217 linear structures along chromosomes upon meiotic entry. SYP-4 was detected along chromosome  
218 segments shortly thereafter, and fully colocalized with HOP-1 tracks during pachytene. Notably, the  
219 region of the germline containing nuclei with fully aligned stretches of SYP-4 and HOP-1 was very short  
220 compared to *C. elegans*, in which SC disassembly occurs close to the bend of the gonadal arm, shortly  
221 prior to diakinesis. In contrast, SC disassembly initiated much earlier in *P. pacificus*; the major fraction of  
222 prophase nuclei is best described as “pachy-diplotene,” since chromosomes remain only partially  
223 synapsed. Six short stretches of SYP-4 were apparent in these nuclei, and persisted over an extended  
224 region (Figure 3A, B). This asymmetrical pattern of the SC is highly reminiscent of a more transient stage

225 in *C. elegans*, in which the SC remains associated with the “short arm” of each homolog pair and  
226 subsequently contributes to the step-wise loss of cohesion during the first and second meiotic divisions  
227 (Lui and Colaiácovo, 2012).

228 HOP-1 localized normally to chromosome axes in *spo-11* and *dmc-1* mutants, but extensive SC  
229 assembly failed. Instead, small, dispersed puncta of SYP-4 were observed along chromosome axes, with  
230 occasional longer tracks (Figure 3C). In contrast to *spo-11* and *dmc-1* mutants, *rad-51* mutants displayed  
231 robust synapsis with a distribution of stages similar to that seen in wild-type hermaphrodites (Figure 3C).  
232 These observations indicate that *spo-11* and *dmc-1* play crucial roles during homologous synapsis in *P.*  
233 *pacificus*, while *rad-51* is dispensable for this process. This further suggests that synapsis initiation may  
234 be tightly coupled to homolog pairing and that SPO-11 and DMC-1, but not RAD-51, play central roles in  
235 this process.

236

### 237 **DMC-1 and RAD-51 localize sequentially during distinct stages of meiotic prophase**

238 To investigate the functions of and interplay between DMC-1 and RAD-51 in *P. pacificus*, we  
239 inserted a V5 epitope tag at the C-terminus of the *Ppa-dmc-1* coding sequence via CRISPR/Cas9 and  
240 raised a polyclonal antibody that recognizes Ppa-RAD-51 (see Materials and Methods). DMC-1::V5  
241 supported normal meiosis, as evidenced by a normal brood size, high embryonic viability and low  
242 percentage of males (Figure 3 – Supplement 1). Surprisingly, the two proteins showed distinct and  
243 nonoverlapping patterns of localization. DMC-1 localized broadly on chromatin in transition zone nuclei  
244 and disappeared immediately upon completion of synapsis. RAD-51 displayed a much more restricted,  
245 punctate distribution along chromosomes, and was only detected in nuclei in which DMC-1 no longer  
246 coated the chromatin (Figure 4A, B). Occasional nuclei at the border between the transition zone and  
247 pachytene region exhibited both DMC-1 and RAD-51, although DMC-1 was very faint in these nuclei  
248 and did not overlap with RAD-51 (Figure 4C). Additionally, DMC-1 remained strongly associated with  
249 chromosomes in some late nuclei that retained clustered DAPI morphology, presumably either “straggler”

250 cells that were delayed in complete synapsis or crossover designation, or were undergoing apoptosis  
251 (Figure 4D).

252 We also tested the interdependence of DMC-1 and RAD-51 recombinases for their localization.  
253 In *S. cerevisiae* and *A. thaliana*, Dmc1 functions as an essential catalyst for interhomolog joint molecule  
254 formation during meiotic DSB repair, while Rad51 acts as an accessory protein for proper Dmc1  
255 nucleofilament formation (Cloud et al., 2012; Da Ines et al., 2013). We did not detect RAD-51 along  
256 chromosomes in the transition zone, where DMC-1 was abundant on chromatin, and we found that DMC-  
257 1::V5 was normal in *rad-51* mutants, indicating that RAD-51 does not play an essential role in the  
258 recruitment of DMC-1 (Figure 4 – Supplement 1A). Conversely, RAD-51 was also observed in some  
259 nuclei in *dmc-1* mutants, specifically in late prophase nuclei proximal to the extended transition zone  
260 (Figure 4 – Supplement 1B). RAD-51 foci were both more abundant and larger in *dmc-1* mutants  
261 compared to wild-type pachytene nuclei, perhaps due to persistent unrepaired DSBs that accumulate in  
262 the absence of DMC-1 protein. Alternatively, the bright foci of RAD-51 observed in late prophase nuclei  
263 could be indicative of an apoptotic response to unrepaired breaks and/or extensive asynapsis.

264 In *spo-11* mutants, which are expected to lack any meiotic DSBs, DMC-1 failed to localize to  
265 chromosomes, and instead formed nuclear aggregates (Figure 4 – Supplement 1C). It was unclear whether  
266 these DMC-1 aggregates were bound to chromatin. Since DMC-1 does not appear to bind specifically at  
267 recombination intermediates in wild-type nuclei, this suggests that the absence of DMC-1 reflects a *spo-*  
268 *11*-dependent regulatory mechanism, likely through activation of a DNA damage signaling pathway,  
269 rather than an absence of potential binding sites. Consistent with cytological evidence that RAD-51  
270 localizes specifically with recombination intermediates, the protein was absent from chromosomes in *spo-*  
271 *11* mutants during meiotic prophase (Figure 4 – Supplement 1E). Detection of RAD-51 foci in the  
272 premeiotic region of *spo-11* mutants provides a positive control for immunofluorescence (Figure 4 –  
273 Supplement 1D). Thus, our data show that DMC-1 and RAD-51 bind to chromatin at different stages of  
274 meiotic prophase and are not interdependent, although both require DSBs for their localization.

275

## 276 **RAD-51 is not required for crossover formation or completion of meiosis**

277 To assess the roles of DMC-1 and RAD-51 in crossover formation, we quantified the number of  
278 DAPI-staining bodies at diakinesis in *dmc-1* and *rad-51* mutants. Wild-type oocytes at this stage  
279 contained ~6 DAPI-staining bodies (average= 5.6), as expected, while in *spo-11* mutants, ~12 DAPI-  
280 staining bodies were present (average= 11.5), consistent with a complete failure of crossover formation in  
281 the absence of DSBs (Figure 5A,B). Interestingly, in *dmc-1* mutant germlines we frequently failed to  
282 detect oocytes at diakinesis, indicative of a defect in meiotic progression and the likely activation of a  
283 checkpoint in response to unrepaired DSBs. In cases when we did observe nuclei at diakinesis, they  
284 contained an average of 11.6 DAPI-staining bodies, reflecting a complete absence of crossovers as in *spo-*  
285 *11* mutants (Figure 5C, D).

286 Somewhat surprisingly, disruption of *rad-51* resulted in homozygous hermaphrodites that were  
287 viable and fertile, although animals produced smaller broods and their embryos showed greatly reduced  
288 viability (Figure 5E). Homozygous *rad-51* mutant gonads also displayed diakinesis nuclei more  
289 frequently than *dmc-1* mutants, although they were absent in 2 out of 20 gonads scored, indicating that  
290 loss of DMC-1 function impairs meiotic progression more severely than loss of RAD-51 (Figure 5C, D).  
291 Consistent with this observation, while *rad-51* mutants had a lower average brood size compared to wild-  
292 type animals, *dmc-1* mutants had even smaller broods, ranging from zero to 35 embryos laid per mutant  
293 homozygote (Figure 5E). In striking contrast to *Cel-rad-51* mutants, which display fragmented chromatin  
294 aggregates at diakinesis (Martin et al., 2005; Rinaldo et al., 2002), *Ppa-rad-51* mutants displayed an  
295 average of 6 DAPI-staining bodies, similar to wild-type (Figure 5B). Together with the relatively high  
296 viability of progeny of *rad-51* homozygous mutants, this indicates that RAD-51 does not play an essential  
297 role in crossover formation in *P. pacificus*.

298

## 299 **Conserved crossover factor COSA-1 marks Class I COs in *P. pacificus***

300 To further analyze crossover formation in *P. pacificus*, we identified the gene encoding the  
301 metazoan meiotic cyclin-related protein COSA-1/Cntd1 and inserted a 3xFLAG epitope tag at the C-

302 terminus of the coding sequence via CRISPR/Cas9. The strain expressing COSA-1::3xFLAG yielded  
303 progeny with high embryonic viability and low percentage of males, demonstrating that the tagged  
304 protein functions sufficiently to support normal meiosis (Figure 3 – Supplement 1). Immunostaining with  
305 anti-FLAG antibodies revealed discrete foci along the SC, beginning as early as zygotene, which  
306 decreased in number and became more intense during the brief pachytene region (Figure 6A, B). Most  
307 pachytene nuclei displayed 6 COSA-1 foci, each of which was associated with an individual SC between  
308 each pair of homologous chromosomes (Figure 6C and Supplementary Video 1). Previous genetic  
309 mapping experiments revealed that homolog pairs often experience multiple crossovers in *P. pacificus*  
310 (Srinivasan et al., 2002). To investigate whether these extra crossovers might arise specifically during  
311 spermatogenesis, we analyzed younger J4 hermaphrodites whose germlines had not yet undergone the  
312 switch from spermatogenesis to oogenesis, which occurs in early adulthood, and found that pachytene  
313 nuclei undergoing spermatogenesis also displayed ~6 COSA-1 foci (Figure 6- Supplemental Figure 1).  
314 This suggests that *P. pacificus*, like *C. elegans*, exhibits complete chromosome-wide Class I CO  
315 interference and, combined with previous genetic data, implies that additional crossovers likely arise  
316 through the Class II CO pathway, which does not require COSA-1.

317 Intriguingly, SC disassembly appeared to be regulated by the position of the lone Class I CO  
318 between each chromosome pair, as in *C. elegans*. By mid-pachy-diplotene, 6 short stretches of SYP-  
319 4::HA were observed, each associated with a single COSA-1::3xFLAG focus near one end (Figure 6B).  
320 During late pachy-diplotene, COSA-1::3xFLAG foci were no longer visible, although short stretches of  
321 SYP-4::HA could still be observed. A major difference from *C. elegans* that occurs in *P. pacificus* during  
322 SC disassembly is the visible splaying of chromosome axes upon removal of the central element  
323 component(s) (Figure 6D). HOP-1 is retained on the axes upon disassembly of the SC though the signal is  
324 more difficult to visualize as two separate axial structures. At this stage, short stretches of SYP-4::HA  
325 colocalize with corresponding bright stretches of HOP-1 (Figure 3B and Figure 6D). Bivalents at  
326 diakinesis also show a cruciform structure similar to that seen in *C. elegans*, indicative that only the Class  
327 I crossovers give rise to chiasmata that persist until diakinesis.

328 We next looked at the pattern of COSA-1::3xFLAG in various mutant backgrounds. As expected,  
329 *dmc-1* mutants showed a complete absence of COSA-1 foci throughout prophase, while 6 foci were  
330 readily observed during pachytene in *rad-51* mutants (Figure 7A). These observations were consistent  
331 with the number of DAPI-staining bodies we observed in diakinesis (Figure 5B). Surprisingly, a few  
332 bright COSA-1::3xFLAG foci were present throughout prophase in *spo-11* mutants (Figure 7A).  
333 However, since ~12 DAPI-staining bodies were observed during diakinesis, we conclude that these  
334 COSA-1 foci do not mark designated COs. A similar phenomenon has been reported in *C. elegans spo-11*  
335 mutants (Nadarajan et al., 2017; Pattabiraman et al., 2017), suggesting that COSA-1 can coalesce at sites  
336 lacking bona fide recombination intermediates.

337

## 338 **DISCUSSION**

339

### 340 **Distinct roles of Dmc1 and Rad51**

341 Rad51 and Dmc1 show very similar activities *in vitro*, but these proteins clearly play non-  
342 redundant functions in meiosis. This is at least in part due to the activity of Dmc-1 specific cofactors, as  
343 well as differential regulation of the timing and activities of the two paralogs. Our analysis of the two  
344 RecA homologs in *P. pacificus*, RAD-51 and DMC-1, defines their distinct contributions during meiosis.

345 The pattern of extensive DMC-1 loading in transition zone nuclei is not likely to reflect an  
346 exorbitant number of DSBs or recombination intermediates present in the genome. Instead we favor the  
347 idea that DMC-1 or its cofactors is specifically regulated at this stage to promote its nonspecific  
348 association with double-stranded DNA or chromatin, and that this regulation depends on *spo-11* activity.  
349 Purified yeast and human Dmc1 protein are capable of binding both ssDNA and dsDNA *in vitro*, although  
350 there is a strong preference for ssDNA binding (Hong et al., 2001; Li et al., 1997; Masson et al., 1999).

351 The sequential localization of DMC-1 and RAD-51 first suggested that they function  
352 independently, and this is supported by our analysis of loss-of-function mutations. By contrast to budding  
353 yeast and *A. thaliana*, Ppa-RAD-51 is dispensable for the activity of DMC-1 in pairing, synapsis, and

354 crossover formation. Instead, RAD-51 appears to play a supporting role in DSB repair during pachytene,  
355 processing excess DSBs that remain after crossover designation has occurred. In *C. elegans*, which  
356 expresses only RAD-51, a similar switch between two modes of double-strand break repair is observed  
357 during meiotic prophase (Hayashi et al., 2007). Association of Ce-RAD-51 with repair intermediates is  
358 differentially regulated from the onset of meiosis until a mid-pachytene transition that coincides with  
359 crossover designation; at this time, competence to convert DSBs to interhomolog COs is also lost. Recent  
360 work revealed an analogous switch from a “meiotic” repair to a “somatic”-like repair pathway during the  
361 transition from mid- to late pachytene in mouse spermatocytes (Enguita-Marruedo et al., 2019). In *P.*  
362 *pacificus*, it is thus likely that DMC-1 and RAD-51 have highly specialized functions: formation of  
363 interhomolog COs by DMC-1 in the transition zone and a more general mode of double-strand break  
364 repair by RAD-51 during pachytene. Furthermore, our observation that nuclei in *rad-51* mutants display  
365 cruciform bivalents and lack fragmented chromatin at diakinesis suggests that excess DSBs can be  
366 repaired through an alternate pathway which does not depend on RAD-51 activity, such as non-  
367 homologous end joining, or that DMC-1 can compensate for RAD-51 but not the other way around. The  
368 nature of RAD-51-dependent DSB repair and how the activities of RAD-51 and DMC-1 are regulated in  
369 early meiotic prophase will be a focus of future investigation in this species.

370

### 371 **Crossover regulation in *P. pacificus***

372 Genetic mapping in *P. pacificus* revealed lengths of ~100-250 centimorgans for each  
373 chromosome, corresponding to 2-5 interhomolog crossovers per meiosis (Srinivasan et al., 2003, 2002).  
374 By contrast, the genetic map of each chromosome in *C. elegans* is 50 cM, reflecting a single crossover per  
375 pair (Hillers et al., 2017). Surprisingly, our analysis of Ppa-COSA-1 localization revealed only a single  
376 COSA-1 focus per chromosome by pachytene, very similar to what is seen in *C. elegans* (Yokoo et al.,  
377 2012). This suggests that either multiple Class I COs occur but only one retains COSA-1, or that all but a  
378 single CO forms by an alternate, COSA-1-independent pathway. In many eukaryotic systems, two CO  
379 pathways co-exist (Gray and Cohen, 2016). Class I COs show spatial interference and depend on factors

380 including MSH-4/5, ZHP-3/Rnf212, and COSA-1/Cntd1. On the other hand, Class II COs do not exhibit  
381 interference and undergo an alternate resolution pathway that requires the structure-specific endonuclease  
382 complex Mus81-Eme1/Mms4. In some species, notably in *A. thaliana* and *S. cerevisiae*, Class II COs can  
383 occur in the absence of Class I COs, but this may not be the case in all organisms. Future work will  
384 examine whether all COs in *P. pacificus* arise only after the single, obligate Class I CO has been  
385 designated, and whether the designation of Class I COs is necessary for the formation and resolution of  
386 Class II COs. We further note that there appears to be only one chiasma formed between each homolog  
387 pair, which is likely created by the lone COSA-1-associated Class I CO. Our work reveals the potential of  
388 *P. pacificus* to address some long-standing questions about mechanisms and regulation of crossover  
389 recombination that are not accessible in the meiotic model *C. elegans* due to the absence of Class II COs  
390 during normal meiosis.

391

## 392 **Comparative analysis of meiosis reveals major variations within the nematode lineage**

393 In addition to establishing key aspects of meiosis in *P. pacificus*, this work also illuminates the  
394 evolutionary history of meiosis in *C. elegans*. A body of prior work has revealed that recombination-  
395 independent homologous synapsis in *C. elegans* relies on pairing centers, specialized chromosome  
396 regions that interact with nuclear envelope and drive chromosome movement during early prophase.  
397 These meiosis-specific dynamics are typically mediated by telomeres, but have shifted to a unique region  
398 on each chromosome in *C. elegans*. Pairing centers also act as the sites of synapsis initiation (Rog and  
399 Dernburg, 2013). By contrast, in other organisms, telomere-led chromosome movement is thought to  
400 promote homologous interactions, but stabilization of pairing and initiation of synapsis occur at early  
401 recombination intermediates, which depend on Spo11 and Dmc1 activity. Pairing center activity depends  
402 on and is largely defined by the recruitment of a family of zinc finger proteins that bind to DNA sequence  
403 motifs in these regions (Phillips et al., 2009). These proteins, known as ZIM-1, ZIM-2, and ZIM-3, and  
404 HIM-8 in *C. elegans*, also act as scaffolds to recruit a cascade of kinase activities required for pairing and  
405 synapsis (Harper et al., 2011; Kim et al., 2015; Labella et al., 2011). Surprisingly, most of the sequenced



406 genomes of nematodes in Clade V include both homologs of the HIM-8/ZIM family and orthologs of  
407 Dmc1, Hop2, and Mnd1 (Figure 2 – Supplement 1). The *Pristionchus* genus is unusual within this Clade  
408 in that it lacks apparent homologs of the pairing center proteins, while *Caenorhabditids* are among the  
409 few genera that have lost Dmc1/Mnd1/Hop2, which were independently lost along the branch leading to  
410 *Oscheius tiuplae* and *Auanema rhodensis*. This suggests that the dominant role of pairing centers in  
411 homologous synapsis is likely to be recently derived, perhaps restricted to *Caenorhabditids*. Future  
412 analysis of species in which Dmc1 and pairing center proteins co-exist may illuminate how synapsis  
413 initiation activity relocated from sites of Dmc1-mediated strand exchange to pairing centers, and thus  
414 how pairing centers acquired their central meiotic roles in *C. elegans*.

415 *C. elegans* is a popular and powerful model system for molecular studies of meiosis. *Pristionchus*  
416 *pacificus* shares many of the same experimental advantages, although naturally has fewer experimental  
417 tools, since it has been developed far more recently. Genome engineering using CRISPR/Cas9 is  
418 somewhat more challenging, and has so far been refractory to large insertions, such as fluorescent  
419 proteins. However, this barrier will likely be overcome through advances in editing efficiency. Perhaps a  
420 greater obstacle is the absence of balancer chromosomes, which are invaluable for maintaining mutations  
421 that reduce viability or fertility in *C. elegans*. Because balancers are unavailable for *P. pacificus*, most of  
422 the mutations described in this work have been maintained in unbalanced heterozygotes through frequent,  
423 labor-intensive genotyping assays. Moreover, the analysis presented here suggests that it may not be  
424 possible to construct crossover-suppressing balancer chromosomes, given that recombination is essential  
425 for homolog pairing and synapsis. By contrast, *C. elegans* uses a derived, recombination-independent  
426 mechanism to robustly pair and synapse homologous chromosomes, which makes it possible to propagate  
427 large-scale chromosome rearrangements that suppress recombination over large genomic regions while  
428 maintaining regular segregation of chromosomes during meiosis.

429 The advent of broadly applicable techniques for genome editing has enabled rapid progress  
430 towards developing *P. pacificus* for molecular studies, along with many other experimental models.

431 Future exploration of meiosis in *P. pacificus*, and perhaps in other nematode models, will further expand  
432 our understanding of core mechanisms and plasticity of sexual reproduction.

433

## 434 MATERIALS AND METHODS

### 435 *P. pacificus* strains and maintenance

436 Animals were cultured on NGM media with *E. coli* OP50 at 20°C under the same standard  
437 conditions as *C. elegans* (Brenner, 1974). The wild-type strain is a derivative of PS312 designated as  
438 “97,” which was provided by Ralf Sommer. This isolate was found to be more amenable to genome  
439 editing by CRISPR-Cas9 than the parental strain. Mutant alleles were maintained in a heterozygous state.  
440 Every few generations and before each immunofluorescence or FISH experiment, single adult  
441 hermaphrodites were picked to new plates and allowed to lay embryos for two days, after which the  
442 genotype of the parent was determined by PCR genotyping. Progeny from heterozygous mothers, one-  
443 fourth of which are homozygous for the meiotic mutation, were analyzed using the assays described here;  
444 heterozygous and wild-type siblings were frequently used as controls, in addition to analysis of unedited  
445 wild-type animals.

446

### 447 *CRISPR/Cas9* genome editing

448 To modify the *P. pacificus* genome, we adapted our preferred CRISPR/Cas9 protocol from *C.*  
449 *elegans* to *P. pacificus*. Equimolar quantities of Alt-R<sup>®</sup> CRISPR-Cas9 crRNA and tracrRNA molecules  
450 (Integrated DNA Technologies, Coralville, IA) were hybridized using a thermocycler (95°C for 5  
451 minutes, then 25°C for 5 minutes). 4µl of 100µM hybridized tracrRNA/crRNA was combined with 4µl  
452 of 40µM *S. pyogenes* Cas9-NLS purified protein (QB3 Macrolab, UC Berkeley, Berkeley, CA) and  
453 incubated at room temperature for 5 minutes. 2µl of 100µM stock of an Ultramer<sup>®</sup> DNA oligo (IDT)  
454 repair template containing 50-60 bp homology arms and the desired epitope or mutation sequence was  
455 added to the mixture, for a total volume of 10µl, and injected into the gonads of 24 hour-post J4 adult  
456 hermaphrodites. Following a 2-4 hour recovery period, injected animals were allowed to lay embryos at

457 20°C for 16-20hr. Four days later, a fraction of the F1 population (typically 150-200 progeny from 6-8  
458 injected P<sub>0</sub>s) was screened for the presence of the mutation or epitope tag sequence by PCR genotyping,  
459 and candidate alleles were verified by Sanger sequencing. A complete list of crRNA, repair template, and  
460 genotyping primer sequences used to generate alleles in this study is provided as Table S1.

461 TALEN constructs were generated using a protocol adapted from Zhang et al. (2011) and  
462 designed using the TAL Effector Nucleotide Targeter 2.0 website (<https://tale-nt.cac.cornell.edu/>).

463

#### 464 *Viability and fertility*

465 To quantify embryonic viability, brood size, and male progeny of wild-type and *rad-51* mutants,  
466 J4 hermaphrodites were picked onto individual plates and transferred every 24 hours over 72 hours total.  
467 Embryos were counted each day, after transferring the adult hermaphrodite to a new plate, and kept at  
468 20°C. Three to four days later, adults were counted on each plate. To analyze *spo-11* and *dmc-1* mutants,  
469 24 individual J4 hermaphrodites were picked from progeny of a verified heterozygous mutant  
470 hermaphrodite. Quantification was performed as in wild type, but after 72 hours, the adult hermaphrodite  
471 was lysed and genotyped for the presence of the mutation. Thus, although 24 animals total were  
472 quantified from a mixed population of *spo-11/+* or *dmc-1/+* animals, data from 5 homozygous *spo-11* and  
473 7 homozygous *dmc-1* mutant animals are reported in the data table, Figure 5E.

474

#### 475 *Immunofluorescence and FISH*

476 To stage animals for each experiment, 30-40 J4s were picked from a PCR-verified heterozygous  
477 mother onto a fresh plate and allowed to develop for an additional 24 or 48 hours at 20°C. Young adult  
478 hermaphrodites were dissected on a clean coverslip in egg buffer containing 0.05% tetramisole and 0.1%  
479 Tween-20. Samples were fixed for 2 minutes in egg buffer with 1% formaldehyde and transferred to a  
480 1.5-ml tube containing PBST. After 5 minutes, the PBST was replaced with ice-cold methanol and  
481 incubated at room temperature for an additional 5 minutes. Worms were washed twice with PBST,  
482 blocked with Roche blocking reagent, and stained with primary antibodies diluted in Roche blocking

483 solution for 1.5-2 hours at room temperature. Samples were washed with PBST and incubated with  
484 secondary antibodies raised in donkey and conjugated with Alexa-488, Cy3 or Cy5 (Jackson  
485 ImmunoResearch Laboratories, West Grove, PA). Worms were then incubated with 1 $\mu$ g/ml DAPI in  
486 PBST, washed with PBST, and mounted in ProLong™ Gold antifade mounting solution (Invitrogen)  
487 before imaging.

488 For embryo staining, 20 plates of mixed-stage worms were harvested with water and treated with  
489 1:8 solution of bleach:water for 5 minutes at room temperature. Embryos were collected by centrifugation  
490 and washed twice with PBS. To dissolve the vitelline membrane, a solution containing 2.6 ml of n-  
491 heptane, 2 ml of PBS, and 1% paraformaldehyde (final) was added to the embryo pellet for 5 minutes at  
492 room temperature with shaking. Treated embryos were collected by centrifugation, washed twice with 5  
493 ml MeOH, three times with PBS, and incubated with Roche blocking reagent, primary, and secondary  
494 antibodies as described above. Embryos were mounted on agarose pads for imaging.

495 For FISH experiments, age-matched animals were dissected and fixed as for immunofluorescence  
496 experiments described above, except that the initial fixation was for 4 minutes in 2% formaldehyde. After  
497 incubation in ice-cold methanol, worms were washed with 2x SSCT twice and incubated in 50% 2x  
498 SSCT/50% formamide solution overnight at 37°C. The next day, the worms were transferred to a small  
499 PCR tube, excess solution was removed from the sample, and a 40  $\mu$ l hybridization mix containing 250ng  
500 of each probe in hybridization buffer (3.5xSSC, 58% formamide, 12.75% dextran sulfate) was added.  
501 The sample was immediately denatured in a thermocycler at 91°C for 2 minutes and incubated overnight  
502 at 37°C. On the last day, the worms were transferred to a 1.5-ml tube and washed with 2xSSCT. After 5  
503 minutes, the solution was replaced with fresh 2xSSCT and mounted with ProLong™ Diamond Antifade  
504 Mountant with DAPI (Invitrogen).

505

#### 506 *FISH probes*

507 Probes for a central locus on chromosome IV and the left end of chromosome X were designed  
508 based on two short tandem repeat motifs. Tandem Repeat Finder v4.09 (Benson, 1999) was used to

509 identify tandem repeats in *P. pacificus* “El Paco” genome assembly (Rödelsperger et al., 2017) using  
510 default parameters and a maximum periodicity of 200 bp. The output was then filtered to identify repeats  
511 that spanned more than 8 kb. These were compared to the genome sequence using BLAST to identify the  
512 subset of sequences restricted to a single major locus per genome. A subset of these repeats was then  
513 tested for specific and robust hybridization with oligonucleotide probes. The Chromosome IV probe  
514 targets the 30-base repeated motif TCATTGAAATGATCACAATCATTGA, which spans 40.1 kb at a  
515 position 11.3 Mb from the left end of chromosome IV. The Chromosome X probe  
516 (GGTGGTCGACGGCTGCGTCG) targets a 30-base repeat motif that spans two very close regions of  
517 29.3kb and 11.1kb on the left end of the X chromosome. Single-stranded oligonucleotides labeled at the  
518 3’ end with 6-FAM or Cy3 dyes were purchased from IDT and used directly as FISH probes.

519

#### 520 *Antibodies*

521 Antibodies against Ppa-RAD-51 were generated against a 6x His-tagged N-terminal fusion  
522 protein (aa 1-103) expressed and purified from bacteria. Four mice were immunized with the antigen.  
523 Serum from one animal, designated S148, was used without purification at 1:300 dilution (Pocono Rabbit  
524 Farm and Laboratory, Canadensis, PA). Antibodies against Ppa-HOP-1 were generated by genetic  
525 immunization against aa 177-276 (SDIX, Newark, DE) and used in the following experiments at 1:300  
526 dilution. Additional antibodies were purchased from commercial sources and diluted as follows: mouse  
527 anti-FLAG (1:500, Sigma #F1804), mouse anti-V5 (1:500, Thermo Fisher #R960-25), rabbit anti-V5  
528 (1:250, Millipore Sigma #V8137), and goat anti-HA (1:500, Novus Biologicals #NB600-362). Secondary  
529 antibodies raised in donkey and labeled with Alexa 488, Cy3, or Cy5 were used at 1:400 dilution (Jackson  
530 ImmunoResearch Laboratories).

531

#### 532 *Orthology analysis and phylogenetic inference*

533 Accessions to all data used in orthology analysis are available in Table S2. We downloaded the  
534 predicted protein sequences of 65 nematode species and five outgroup taxa and filtered for the longest

535 isoform of each gene. OrthoFinder (Emms and Kelly, 2015) was used to cluster all protein sequences into  
536 putative orthologous groups (OGs) using the default inflation value of 1.5. OGs containing loci which  
537 were present in at least 75% of species and which were, on average, single copy (mean < 1.3) were  
538 selected. We aligned each selected OG using MAFFT (Katoh and Standley, 2013) and generated a  
539 maximum likelihood tree along with 1000 ultrafast bootstraps (Hoang et al., 2018) using IQ-TREE  
540 (Nguyen et al., 2015), allowing the best-fitting substitution model to be selected automatically  
541 (Kalyaanamoorthy et al., 2017). Each tree was screened by PhyloTreePruner (Kocot et al., 2013);  
542 collapsing nodes with bootstrap support <90), and any OGs containing paralogues were discarded. If two  
543 representative sequences were present for any species (*i.e.*, “in-paralogs”) after this paralog screening  
544 step, the longest of the two sequences was retained and the other discarded. We then realigned the  
545 remaining OGs using MAFFT and trimmed spuriously aligned regions using trimAl (Capella-Gutiérrez et  
546 al., 2009). The trimmed alignments were subsequently concatenated using catfasta2phyml (available at  
547 <https://github.com/nylander/catfasta2phyml>) to form a supermatrix. We inferred the nematode species tree  
548 using IQ-TREE with the general time reversible model (GTR) with gamma-distributed rate variation  
549 among sites. The resulting tree was visualized using iTOL (Letunic and Bork, 2016).

550 We identified the OGs which contain orthologs of DMC-1, MND-1, HOP-2 and RAD-51 using  
551 BLASTP to search using the orthologous protein sequences from *Homo sapiens* as queries. The OG  
552 containing the *C. elegans* proteins HIM-8, ZIM-1, ZIM-2, ZIM-3 was identified using the appropriate  
553 transcript IDs. Each OG was aligned using MAFFT and a gene tree was inferred using IQ-TREE,  
554 allowing the best-fitting substitution model to be selected automatically. Each gene tree was visually  
555 inspected using iTOL.

556

#### 557 *Total RNAseq*

558 Total RNA was isolated from 20 whole worms or 30 dissected gonads from 48 h post J4 animals  
559 using TRIzol (Invitrogen). TruSeq Stranded Total RNA (Illumina) sequencing libraries were constructed  
560 following the manufacturer's instructions. For both conditions, three independent libraries were

561 constructed. Libraries were pooled and sequenced on a HiSeq4000 (150bp, PE, QB3 Vincent J. Coates  
562 Genomics Sequencing Laboratory). Reads were mapped to the “El Paco” genome assembly including  
563 annotated splice sites (Rödelsperger et al., 2017) using STAR. To correct misannotated splice sites, a  
564 transcriptome was then reconstructed de novo using StringTie. Transdecoder was used to generate  
565 potential open reading frames. To identify potential meiotic genes, we identified genes enriched in  
566 dissected gonads over whole worms using HTSeq and edgeR.

567

## 568 **Acknowledgements**

569 This work was supported by funding from the Howard Hughes Medical Institute to AFD and a  
570 fellowship from the Helen Hay Whitney Foundation to JB. This work used the Vincent J. Coates  
571 Genomics Sequencing Laboratory at UC Berkeley, supported by NIH S10 OD018174 Instrumentation  
572 Grant. We are grateful to Ralf J. Sommer, Ray Hong, and other members of the *P. pacificus* research  
573 community for providing us with *P. pacificus* strains and abundant helpful advice. We thank members of  
574 the Dernburg lab for helpful discussions about this work and critical reading of the manuscript.

575

## 576 **Figure Legends**

577 **Figure 1.** Germline organization and meiotic progression in *P. pacificus* is superficially similar to *C.*  
578 *elegans*. A. Projection image of a *P. pacificus* hermaphrodite gonad stained with DAPI. Scale bar, 30  
579  $\mu\text{m}$ . Insets show representative nuclei from the premeiotic region (PM), transition zone (TZ), pachytene  
580 (Pach), diplotene (Dip), diffuse stage (Diff) and diakinesis. Scale bar, 5  $\mu\text{m}$ . B. Distal region of a *P.*  
581 *pacificus* germline injected with 0.3 nM Cy3-dUTP solution, dissected and stained with DAPI after 30  
582 minutes of recovery. Scale bar, 30  $\mu\text{m}$ . C. Mitotic chromosomes (DAPI) in a 2-4 cell stage embryo and  
583 the premeiotic germline of adult hermaphrodites expressing CENP-C::V5 (magenta). Scale bar, 2  $\mu\text{m}$ .

584

585 **Figure 2.** Stable homolog pairing requires early recombination factors. A. Diagram showing the  
586 locations of tandem repeat sequences used to generate DNA FISH probes for pairing analysis in *P.*

587 *pacificus*. B. Representative images show the progression of homolog pairing of Chromosome X  
588 (magenta) and Chromosome IV (yellow) during meiotic prophase in wild-type hermaphrodites.  
589 Premeiotic region (PM), transition zone (TZ), and pachytene (Pach). Scale bar, 5  $\mu$ m. C. Representative  
590 images of FISH probe signals in *spo-11*, *dmc-1*, and *rad-51* mutants during mid-prophase stage (roughly  
591 equivalent to the pachytene stage in wild-type germlines). Scale bar, 5  $\mu$ m. D. Temporal progression of X  
592 and IV chromosome pairing in WT, *spo-11*, *dmc-1*, and *rad-51* mutants. Distance between pairs of  
593 corresponding FISH signals were measured in 3D using Softworx or Prism for three gonads of each  
594 genotype. Each gonad was divided into five zones of equal length, from the distal tip to the bend of the  
595 gonad arm, and the distances between pairs of homologous FISH signals are presented in a scatter plot  
596 diagram. E. Distance between pairs of heterologous FISH signals were measured in premeiotic (PM) and  
597 transition zone (TZ) nuclei in WT, *spo-11* and *dmc-1* mutants (spanning zones 1 and 2 only). Distances  
598 between pairs of homologous FISH signals (Chrom X and IV combined) in TZ nuclei are included for  
599 comparison. \*\*\* $p < .0001$ , by Student's *t*-test.

600

601 **Figure 2- Supplementary Figure 1.** Partial representation of the nematode lineage, including 65  
602 nematode species, and five outgroup taxa showing the presence of meiotic proteins. D= Dmc1; M=  
603 Mnd1; H= Hop2; Z= HIM-8/ZIM-1,2,3. *C. elegans* and *P. pacificus* are highlighted in blue.

604

605 **Figure 2- Supplementary Figure 2.** A. Composite projection images of whole gonads stained with  
606 DAPI from WT, *spo-11*, *dmc-1*, and *rad-51* mutants. The extent of the transition zone of each gonad is  
607 underlined with dashed lines. Scale bar, 30  $\mu$ m. B. Quantification of transition zone length relative to the  
608 length from meiotic onset to the end of pachytene in WT (n=7), *spo-11* (n=7), *dmc-1* (n=7), and *rad-51*  
609 (n=10). Error bars indicate mean  $\pm$  standard deviation. *spo-11* and *dmc-1* mutants show significant  
610 differences from WT ( $p < 0.0001$ ) but not *Ppa-rad-51* ( $p = 0.8426$ ) by ordinary one-way ANOVA.

611



612 **Figure 3.** SPO-11 and DMC-1 are required, while RAD-51 is dispensable, for homologous synapsis in *P.*  
613 *pacificus*. A. Composite projection image of a wild-type strain expressing Ppa-SYP-4::HA, stained with  
614 DAPI (gray), anti-HOP-1 (red), and anti-HA (green). Meiotic progression is from left to right. Scale bar,  
615 30  $\mu\text{m}$ . B. Higher magnification images of wild-type nuclei in the premeiotic region (PM), transition  
616 zone (TZ), pachytene (Pach), and pachy-diplotene (P-D) stages. C. Localization of Ppa-SYP-4::HA and  
617 Ppa-HOP-1 in WT, *spo-11*, *dmc-1*, and *rad-51* mutants during early and mid-prophase (roughly  
618 equivalent to the TZ and Pach regions in wild-type germlines, respectively). Synapsis fails in *spo-11* and  
619 *dmc-1* mutants but forms normally in the *rad-51* background. Scale bar, 5  $\mu\text{m}$ .

620  
621 **Figure 4.** DMC-1 and RAD-51 localize sequentially to meiotic chromosomes. A. Composite projection  
622 image of a wild-type gonad expressing DMC-1::V5, stained with DAPI (blue), anti-V5 (magenta), and  
623 anti-RAD-51 (yellow). Meiotic progression is from left to right. Scale bar, 30  $\mu\text{m}$ . Inset shows the distinct  
624 localization of DMC-1 (magenta) and RAD-51 (yellow) in the transition zone and pachytene regions,  
625 respectively. Scale bar, 5  $\mu\text{m}$ . B. Higher magnification images of nuclei in the transition zone and  
626 pachytene region. DMC-1 is present along chromatin in the transition zone and disappears at pachytene.  
627 By contrast, RAD-51 localizes to discrete foci starting at pachytene. Scale bar, 5  $\mu\text{m}$ . C. Occasional  
628 nucleus on the border of the transition zone and pachytene region display both DMC-1 and RAD-51. The  
629 signals do not completely overlap. Scale bar, 2  $\mu\text{m}$ . D. Nucleus with clustered DAPI morphology and  
630 strong association of DMC-1 during later prophase. DMC-1 localizes to chromatin in “straggler” cells  
631 that presumably have not completed synapsis or CO designation, or are undergoing apoptosis. Scale bar,  
632 2  $\mu\text{m}$ .

633  
634 **Figure 4- Supplementary Figure 1.** DMC-1 and RAD-51 do not depend on each other for their  
635 localization to chromosomes, but both require DSBs. A. DMC-1 (magenta) is abundant on chromosomes  
636 in transition zone nuclei of *rad-51* mutants. Anti-RAD-51 immunofluorescence was used to identify  
637 homozygous mutants among the progeny of heterozygotes. B. RAD-51 foci are observed in late

638 pachytene nuclei, proximal to the extended transition zone, of *dmc-1* mutants. RAD-51 foci appear larger  
639 and more numerous than in wild-type pachytene nuclei. C. DMC-1 forms nuclear aggregates in *spo-11*  
640 mutants and does not localize along chromosomes. D and E. RAD-51 foci are detected in premeiotic  
641 nuclei of *spo-11* mutants but are absent during meiotic prophase.

642

643 **Figure 5.** Crossover formation requires SPO-11 and DMC-1, but not RAD-51. A. Representative images  
644 of DAPI-staining bodies at diakinesis for each indicated genotype. Scale bar, 5  $\mu$ m. B. Quantification of  
645 DAPI-staining bodies in the -1 oocyte at diakinesis for each indicated genotype (*n*= represents number of  
646 nuclei scored). C. Quantification of gonads which lacked nuclei with DAPI-staining bodies at diakinesis  
647 stage. *n* is the number of germlines scored for each genotype. D. Representative images of wild type,  
648 *dmc-1*, and *rad-51* mutant proximal germlines. In wild-type germlines, diakinesis nuclei with fully  
649 condensed DAPI-staining bodies are present distal to the spermatheca. However, nuclei with late  
650 prophase stage DAPI morphology are frequently found adjacent to the spermatheca in *dmc-1* mutants and  
651 more rarely in *rad-51* mutants. Meiotic progression is from left to right. Scale bar, 5  $\mu$ m. E. Frequencies  
652 of viable embryos and male progeny of whole broods from wild type, *spo-11*, *dmc-1* and *rad-51* mutant  
653 hermaphrodites.

654

655 **Figure 6.** COSA-1/Cntd1 accumulates at a single site per chromosome pair. A. Composite projection  
656 image of a wild-type strain expressing three epitope-tagged proteins (COSA-1::3xFLAG, DMC-1::V5,  
657 and SYP-4::HA), stained with anti-FLAG, anti-V5 and anti-HA antibodies. Scale bar, 30  $\mu$ m. B. Higher  
658 magnification images of nuclei from the transition zone (TZ), pachytene (pach), mid- and late pachy-  
659 diplotene (P-D). COSA-1::3xFLAG (green) foci are detected in transition zone nuclei but do not  
660 colocalize with DMC-1::V5 (cyan). Foci peak in brightness in pachytene nuclei and gradually become  
661 dimmer until they are no longer detected during late pachy-diplotene. In early to mid- pachy-diplotene  
662 nuclei, six short stretches of SYP-4::HA (magenta) are observed per nucleus, each associated with a  
663 single COSA-1::3xFLAG focus. Scale bar, 5  $\mu$ m. C. Histogram showing the number of COSA-

664 1::3xFLAG foci observed per nucleus in the pachytene region. Analysis was restricted to 15 nuclei per  
665 gonad immediately proximal to the transition zone and lacking DMC-1::V5 signal. Five individual  
666 gonads were analyzed, for a total of 75 nuclei scored. D. Partial projection of a representative nucleus in  
667 mid to late pachy-diplotene, stained with anti-HOP-1 (blue), anti-HA (marking the SC, magenta), and  
668 anti-FLAG (marking COSA-1, green). A single COSA-1::3xFLAG focus is observed at a junction  
669 (marked with a red arrowhead) between the “short arm,” where SYP-4::HA is retained, and splayed “long  
670 arms” lacking SC but positive for HOP-1. Scale bar, 2  $\mu$ m.

671  
672 **Figure 6 - Supplemental Figure 1.** COSA-1/Cntd1 accumulates at a single site per chromosome pair  
673 during spermatogenesis. Composite projection image of a wild-type gonad from a J4-stage hermaphrodite  
674 expressing COSA-1::3xFLAG (green) and SYP-4::HA (magenta). Scale bar, 30  $\mu$ m. At this stage the  
675 germline is still undergoing spermatogenesis. Inset shows a higher magnification image of nuclei in the  
676 pachytene region. As during oogenesis, ~6 COSA-1::3xFLAG foci are observed in pachytene nuclei  
677 during spermatogenesis. Scale bar, 5  $\mu$ m.

678  
679 **Figure 6 - Supplementary Video 1.** COSA-1/Cntd1 accumulates at a single site per chromosome pair.  
680 3D volume rendering of a single nucleus from the pachytene region of a wild-type worm expressing  
681 COSA-1::3xFLAG (green) and SYP-4::HA (magenta). Each frame is a maximum intensity projection  
682 from a region of a deconvolved 3D image. Each stretch of SYP-4::HA is associated with a COSA-  
683 1::3xFLAG focus.

684  
685 **Figure 7.** COSA-1::3xFLAG accumulates at sites of presumptive Class I COs. A. Nuclei from  
686 hermaphrodites of the indicated genotype displaying COSA-1::3xFLAG (green) in early and mid-  
687 prophase (roughly equivalent to the transition zone and pachytene regions in wild-type germlines,  
688 respectively). COSA-1 foci are absent in *dmc-1* mutants, but 6 foci per nucleus are detected in wild type  
689 and *rad-51* mutants. A few small foci are detected in *spo-11* mutants. Scale bar, 5  $\mu$ m.

690

691

## 692 REFERENCES

- 693 Aravind L, Koonin EV. 1998. The HORMA domain: a common structural denominator in mitotic  
694 checkpoints, chromosome synapsis and DNA repair. *Trends Biochem Sci* **23**:284–286.
- 695 Benson G. 1999. Tandem repeats finder: a program to analyze DNA sequences. *Nucleic Acids Research*.  
696 doi:10.1093/nar/27.2.573
- 697 Bishop DK, Park D, Xu L, Kleckner N. 1992. DMC1: A meiosis-specific yeast homolog of E. coli recA  
698 required for recombination, synaptonemal complex formation, and cell cycle progression. *Cell*  
699 **69**:439–456. doi:10.1016/0092-8674(92)90446-j
- 700 Bolt BJ, Rodgers FH, Shafie M, Kersey PJ, Berriman M, Howe KL. 2018. Using WormBase ParaSite: An  
701 Integrated Platform for Exploring Helminth Genomic Data. *Methods Mol Biol* **1757**:471–491.  
702 doi:10.1007/978-1-4939-7737-6\_15
- 703 Brenner S. 1974. The genetics of *Caenorhabditis elegans*. *Genetics* **77**:71–94.
- 704 Capella-Gutiérrez S, Silla-Martínez JM, Gabaldón T. 2009. trimAl: a tool for automated alignment  
705 trimming in large-scale phylogenetic analyses. *Bioinformatics* **25**:1972–1973.  
706 doi:10.1093/bioinformatics/btp348
- 707 Christophorou N, Rubin T, Huynh J-R. 2013. Synaptonemal complex components promote centromere  
708 pairing in pre-meiotic germ cells. *PLoS Genet* **9**:e1004012. doi:10.1371/journal.pgen.1004012
- 709 Cloud V, Chan Y-L, Grubb J, Budke B, Bishop DK. 2012. Rad51 is an accessory factor for Dmcl-  
710 mediated joint molecule formation during meiosis. *Science* **337**:1222–1225.  
711 doi:10.1126/science.1219379
- 712 Colaiácovo MP, MacQueen AJ, Martinez-Perez E, McDonald K, Adamo A, La Volpe A, Villeneuve AM.  
713 2003. Synaptonemal Complex Assembly in *C. elegans* Is Dispensable for Loading Strand-Exchange  
714 Proteins but Critical for Proper Completion of Recombination. *Developmental Cell*.  
715 doi:10.1016/s1534-5807(03)00232-6
- 716 Couteau F, Belzile F, Horlow C, Grandjean O, Vezon D, Doutriaux M-P. 1999. Random Chromosome  
717 Segregation without Meiotic Arrest in Both Male and Female Meiocytes of a dmcl Mutant of  
718 *Arabidopsis*. *Plant Cell* **11**:1623. doi:10.2307/3871042
- 719 Da Ines O, Degroote F, Goubely C, Amiard S, Gallego ME, White CI. 2013. Meiotic Recombination in  
720 *Arabidopsis* Is Catalysed by DMC1, with RAD51 Playing a Supporting Role. *PLoS Genet*  
721 **9**:e1003787. doi:10.1371/journal.pgen.1003787
- 722 Dieterich C, Clifton SW, Schuster LN, Chinwalla A, Delehaunty K, Dinkelacker I, Fulton L, Fulton R,  
723 Godfrey J, Minx P, Mitreva M, Roeseler W, Tian H, Witte H, Yang S-P, Wilson RK, Sommer RJ.  
724 2008. The *Pristionchus pacificus* genome provides a unique perspective on nematode lifestyle and  
725 parasitism. *Nat Genet* **40**:1193–1198. doi:10.1038/ng.227
- 726 Emms DM, Kelly S. 2015. OrthoFinder: solving fundamental biases in whole genome comparisons  
727 dramatically improves orthogroup inference accuracy. *Genome Biol* **16**:157. doi:10.1186/s13059-  
728 015-0721-2
- 729 Enguita-Marruedo A, Martín-Ruiz M, García E, Gil-Fernández A, Parra MT, Viera A, Rufas JS, Page J.  
730 2019. Transition from a meiotic to a somatic-like DNA damage response during the pachytene stage  
731 in mouse meiosis. *PLoS Genet* **15**:e1007439. doi:10.1371/journal.pgen.1007439
- 732 Gray S, Cohen PE. 2016. Control of Meiotic Crossovers: From Double-Strand Break Formation to  
733 Designation. *Annu Rev Genet* **50**:175–210. doi:10.1146/annurev-genet-120215-035111
- 734 Grelon M. 2001. AtSPO11-1 is necessary for efficient meiotic recombination in plants. *EMBO J* **20**:589–  
735 600. doi:10.1093/emboj/20.3.589
- 736 Harper NC, Rillo R, Jover-Gil S, Assaf ZJ, Bhalla N, Dernburg AF. 2011. Pairing centers recruit a Polo-

- 737 like kinase to orchestrate meiotic chromosome dynamics in *C. elegans*. *Dev Cell* **21**:934–947.  
738 doi:10.1016/j.devcel.2011.09.001
- 739 Hayashi M, Chin GM, Villeneuve AM. 2007. *C. elegans* germ cells switch between distinct modes of  
740 double-strand break repair during meiotic prophase progression. *PLoS Genet* **3**:e191.  
741 doi:10.1371/journal.pgen.0030191
- 742 Hillers KJ, Jantsch V, Martinez-Perez E, Yanowitz JL. 2017. Meiosis. *WormBook* **2017**:1–43.  
743 doi:10.1895/wormbook.1.178.1
- 744 Hoang DT, Chernomor O, von Haeseler A, Minh BQ, Vinh LS. 2018. UFBoot2: Improving the Ultrafast  
745 Bootstrap Approximation. *Mol Biol Evol* **35**:518–522. doi:10.1093/molbev/msx281
- 746 Hong EL, Shinohara A, Bishop DK. 2001. *Saccharomyces cerevisiae* Dmc1 protein promotes renaturation  
747 of single-strand DNA (ssDNA) and assimilation of ssDNA into homologous super-coiled duplex  
748 DNA. *J Biol Chem* **276**:41906–41912. doi:10.1074/jbc.M105563200
- 749 Hong RL, Sommer RJ. 2006. *Pristionchus pacificus*: a well-rounded nematode. *Bioessays* **28**:651–659.  
750 doi:10.1002/bies.20404
- 751 Joyce EF, Apostolopoulos N, Beliveau BJ, Wu C-T. 2013. Germline progenitors escape the widespread  
752 phenomenon of homolog pairing during *Drosophila* development. *PLoS Genet* **9**:e1004013.  
753 doi:10.1371/journal.pgen.1004013
- 754 Kalyanamoorthy S, Minh BQ, Wong TKF, von Haeseler A, Jermin LS. 2017. ModelFinder: fast model  
755 selection for accurate phylogenetic estimates. *Nat Methods* **14**:587–589. doi:10.1038/nmeth.4285
- 756 Katoh K, Standley DM. 2013. MAFFT multiple sequence alignment software version 7: improvements in  
757 performance and usability. *Mol Biol Evol* **30**:772–780. doi:10.1093/molbev/mst010
- 758 Keeney S. 2008. Spo11 and the Formation of DNA Double-Strand Breaks in Meiosis. *Genome Dyn Stab*  
759 **2**:81–123. doi:10.1007/7050\_2007\_026
- 760 Keeney S, Giroux CN, Kleckner N. 1997. Meiosis-specific DNA double-strand breaks are catalyzed by  
761 Spo11, a member of a widely conserved protein family. *Cell* **88**:375–384.
- 762 Kim Y, Kostow N, Dernburg AF. 2015. The Chromosome Axis Mediates Feedback Control of CHK-2 to  
763 Ensure Crossover Formation in *C. elegans*. *Dev Cell* **35**:247–261. doi:10.1016/j.devcel.2015.09.021
- 764 Kocot KM, Citarella MR, Moroz LL, Halanych KM. 2013. PhyloTreePruner: A Phylogenetic Tree-Based  
765 Approach for Selection of Orthologous Sequences for Phylogenomics. *Evol Bioinform Online*  
766 **9**:429–435. doi:10.4137/EBO.S12813
- 767 Labella S, Woglar A, Jantsch V, Zetka M. 2011. Polo kinases establish links between meiotic  
768 chromosomes and cytoskeletal forces essential for homolog pairing. *Dev Cell* **21**:948–958.  
769 doi:10.1016/j.devcel.2011.07.011
- 770 Letunic I, Bork P. 2016. Interactive tree of life (iTOL) v3: an online tool for the display and annotation of  
771 phylogenetic and other trees. *Nucleic Acids Res* **44**:W242–5. doi:10.1093/nar/gkw290
- 772 Li Z, Golub EI, Gupta R, Radding CM. 1997. Recombination activities of HsDmc1 protein, the meiotic  
773 human homolog of RecA protein. *Proc Natl Acad Sci U S A* **94**:11221–11226.
- 774 Lo T-W, Pickle CS, Lin S, Ralston EJ, Gurling M, Schartner CM, Bian Q, Doudna JA, Meyer BJ. 2013.  
775 Precise and heritable genome editing in evolutionarily diverse nematodes using TALENs and  
776 CRISPR/Cas9 to engineer insertions and deletions. *Genetics* **195**:331–348.  
777 doi:10.1534/genetics.113.155382
- 778 Lui DY, Colaiácovo MP. 2012. Meiotic Development in *Caenorhabditis elegans* Advances in  
779 Experimental Medicine and Biology. pp. 133–170. doi:10.1007/978-1-4614-4015-4\_6
- 780 MacQueen AJ, Colaiácovo MP, McDonald K, Villeneuve AM. 2002. Synapsis-dependent and -  
781 independent mechanisms stabilize homolog pairing during meiotic prophase in *C. elegans*. *Genes*  
782 *Dev* **16**:2428–2442. doi:10.1101/gad.1011602
- 783 MacQueen AJ, Phillips CM, Bhalla N, Weiser P, Villeneuve AM, Dernburg AF. 2005. Chromosome sites  
784 play dual roles to establish homologous synapsis during meiosis in *C. elegans*. *Cell* **123**:1037–1050.  
785 doi:10.1016/j.cell.2005.09.034
- 786 Martinez-Perez E, Colaiácovo MP. 2009. Distribution of meiotic recombination events: talking to your  
787 neighbors. *Curr Opin Genet Dev* **19**:105–112. doi:10.1016/j.gde.2009.02.005

- 788 Martin JS, Winkelmann N, Petalcorin MIR, McIlwraith MJ, Boulton SJ. 2005. RAD-51-dependent and -  
789 independent roles of a *Caenorhabditis elegans* BRCA2-related protein during DNA double-strand  
790 break repair. *Mol Cell Biol* **25**:3127–3139. doi:10.1128/MCB.25.8.3127-3139.2005
- 791 Masson JY, Davies AA, Hajibagheri N, Van Dyck E, Benson FE, Stasiak AZ, Stasiak A, West SC. 1999.  
792 The meiosis-specific recombinase hDmc1 forms ring structures and interacts with hRad51. *EMBO J*  
793 **18**:6552–6560. doi:10.1093/emboj/18.22.6552
- 794 Nadarajan S, Lambert TJ, Altendorfer E, Gao J, Blower MD, Waters JC, Colaiácovo MP. 2017. Polo-like  
795 kinase-dependent phosphorylation of the synaptonemal complex protein SYP-4 regulates double-  
796 strand break formation through a negative feedback loop. *Elife* **6**. doi:10.7554/eLife.23437
- 797 Namai S, Sugimoto A. 2018. Transgenesis by microparticle bombardment for live imaging of fluorescent  
798 proteins in *Pristionchus pacificus* germline and early embryos. *Dev Genes Evol* **228**:75–82.  
799 doi:10.1007/s00427-018-0605-z
- 800 Nguyen L-T, Schmidt HA, von Haeseler A, Minh BQ. 2015. IQ-TREE: a fast and effective stochastic  
801 algorithm for estimating maximum-likelihood phylogenies. *Mol Biol Evol* **32**:268–274.  
802 doi:10.1093/molbev/msu300
- 803 Pattabiraman D, Roelens B, Woglar A, Villeneuve AM. 2017. Meiotic recombination modulates the  
804 structure and dynamics of the synaptonemal complex during *C. elegans* meiosis. doi:10.1101/110064
- 805 Penkner AM, Fridkin A, Gloggnitzer J, Baudrimont A, Machacek T, Woglar A, Csaszar E, Pasierbek P,  
806 Ammerer G, Gruenbaum Y, Jantsch V. 2009. Meiotic chromosome homology search involves  
807 modifications of the nuclear envelope protein Matefin/SUN-1. *Cell* **139**:920–933.  
808 doi:10.1016/j.cell.2009.10.045
- 809 Phillips CM, Dernburg AF. 2006. A family of zinc-finger proteins is required for chromosome-specific  
810 pairing and synapsis during meiosis in *C. elegans*. *Dev Cell* **11**:817–829.  
811 doi:10.1016/j.devcel.2006.09.020
- 812 Phillips CM, Wong C, Bhalla N, Carlton PM, Weiser P, Meneely PM, Dernburg AF. 2005. HIM-8 binds  
813 to the X chromosome pairing center and mediates chromosome-specific meiotic synapsis. *Cell*  
814 **123**:1051–1063. doi:10.1016/j.cell.2005.09.035
- 815 Pires-daSilva A. 2004. Conservation of the global sex determination gene *tra-1* in distantly related  
816 nematodes. *Genes Dev* **18**:1198–1208. doi:10.1101/gad.293504
- 817 Pittman DL, Cobb J, Schimenti KJ, Wilson LA, Cooper DM, Brignull E, Handel MA, Schimenti JC.  
818 1998. Meiotic Prophase Arrest with Failure of Chromosome Synapsis in Mice Deficient for *Dmc1*, a  
819 Germline-Specific RecA Homolog. *Mol Cell* **1**:697–705. doi:10.1016/s1097-2765(00)80069-6
- 820 Rinaldo C, Bazzicalupo P, Ederle S, Hilliard M, La Volpe A. 2002. Roles for *Caenorhabditis elegans* rad-  
821 51 in meiosis and in resistance to ionizing radiation during development. *Genetics* **160**:471–479.
- 822 Rockmill B, Sym M, Scherthan H, Roeder GS. 1995. Roles for two RecA homologs in promoting meiotic  
823 chromosome synapsis. *Genes Dev* **9**:2684–2695. doi:10.1101/gad.9.21.2684
- 824 Rödelsperger C, Meyer JM, Prabh N, Lanz C, Bemm F, Sommer RJ. 2017. Single-Molecule Sequencing  
825 Reveals the Chromosome-Scale Genomic Architecture of the Nematode Model Organism  
826 *Pristionchus pacificus*. *Cell Rep* **21**:834–844. doi:10.1016/j.celrep.2017.09.077
- 827 Rog O, Dernburg AF. 2013. Chromosome pairing and synapsis during *Caenorhabditis elegans* meiosis.  
828 *Current Opinion in Cell Biology*. doi:10.1016/j.ceb.2013.03.003
- 829 Rubin T, Christophorou N, Huynh J-R. 2016. How to pre-pair chromosomes for meiosis. *Cell Cycle*  
830 **15**:609–610. doi:10.1080/15384101.2015.1131524
- 831 Rudel D, Riebesell M, Sommer RJ. 2005. Gonadogenesis in *Pristionchus pacificus* and organ evolution:  
832 development, adult morphology and cell–cell interactions in the hermaphrodite gonad.  
833 *Developmental Biology*. doi:10.1016/j.ydbio.2004.09.021
- 834 Sato A, Isaac B, Phillips CM, Rillo R, Carlton PM, Wynne DJ, Kasad RA, Dernburg AF. 2009.  
835 Cytoskeletal forces span the nuclear envelope to coordinate meiotic chromosome pairing and  
836 synapsis. *Cell* **139**:907–919. doi:10.1016/j.cell.2009.10.039
- 837 Smolikov S, Eizinger A, Schild-Prufert K, Hurlburt A, McDonald K, Engebrecht J, Villeneuve AM,  
838 Colaiácovo MP. 2007. SYP-3 restricts synaptonemal complex assembly to bridge paired

- 839 chromosome axes during meiosis in *Caenorhabditis elegans*. *Genetics* **176**:2015–2025.  
840 doi:10.1534/genetics.107.072413
- 841 Smolikov S, Schild-Prüfert K, Colaiácovo MP. 2009. A yeast two-hybrid screen for SYP-3 interactors  
842 identifies SYP-4, a component required for synaptonemal complex assembly and chiasma formation  
843 in *Caenorhabditis elegans* meiosis. *PLoS Genet* **5**:e1000669. doi:10.1371/journal.pgen.1000669
- 844 Sommer RJ. 2015. *Pristionchus pacificus*: A Nematode Model for Comparative and Evolutionary  
845 Biology. BRILL.
- 846 Sommer RJ, Carta LK, Kim S-Y, Sternburg PW. 1996. Morphological, genetic and molecular  
847 description of *Pristionchus pacificus* sp. N. (Nematoda: Neodiplogastridae). *Fundam. Appl.*  
848 *Nematol.* **19**: 511-521
- 849 Srinivasan J, Sinz W, Jesse T, Wiggers-Perebolte L, Jansen K, Buntjer J, van der Meulen M, Sommer RJ.  
850 2003. An integrated physical and genetic map of the nematode *Pristionchus pacificus*. *Mol Genet*  
851 *Genomics* **269**:715–722. doi:10.1007/s00438-003-0881-8
- 852 Srinivasan J, Sinz W, Lanz C, Brand A, Nandakumar R, Raddatz G, Witte H, Keller H, Kipping I, Pires-  
853 daSilva A, Jesse T, Millare J, de Both M, Schuster SC, Sommer RJ. 2002. A bacterial artificial  
854 chromosome-based genetic linkage map of the nematode *Pristionchus pacificus*. *Genetics* **162**:129–  
855 134.
- 856 Vader G, Musacchio A. 2014. HORMA domains at the heart of meiotic chromosome dynamics. *Dev Cell*  
857 **31**:389–391. doi:10.1016/j.devcel.2014.11.009
- 858 Villeneuve AM, Hillers KJ. 2001. Whence meiosis? *Cell* **106**:647–650.
- 859 Witte H, Moreno E, Rödelberger C, Kim J, Kim J-S, Streit A, Sommer RJ. 2015. Gene inactivation using  
860 the CRISPR/Cas9 system in the nematode *Pristionchus pacificus*. *Dev Genes Evol* **225**:55–62.  
861 doi:10.1007/s00427-014-0486-8
- 862 Yokoo R, Zawadzki KA, Nabeshima K, Drake M, Arur S, Villeneuve AM. 2012. COSA-1 reveals robust  
863 homeostasis and separable licensing and reinforcement steps governing meiotic crossovers. *Cell*  
864 **149**:75–87. doi:10.1016/j.cell.2012.01.052
- 865 Yoshida K, Kondoh G, Matsuda Y, Habu T, Nishimune Y, Morita T. 1998. The Mouse RecA -like Gene  
866 Dmc1 Is Required for Homologous Chromosome Synapsis during Meiosis. *Mol Cell* **1**:707–718.  
867 doi:10.1016/s1097-2765(00)80070-2
- 868 Zickler D, Kleckner N. 1999. Meiotic chromosomes: integrating structure and function. *Annu Rev Genet*  
869 **33**:603–754. doi:10.1146/annurev.genet.33.1.603

Figure 1

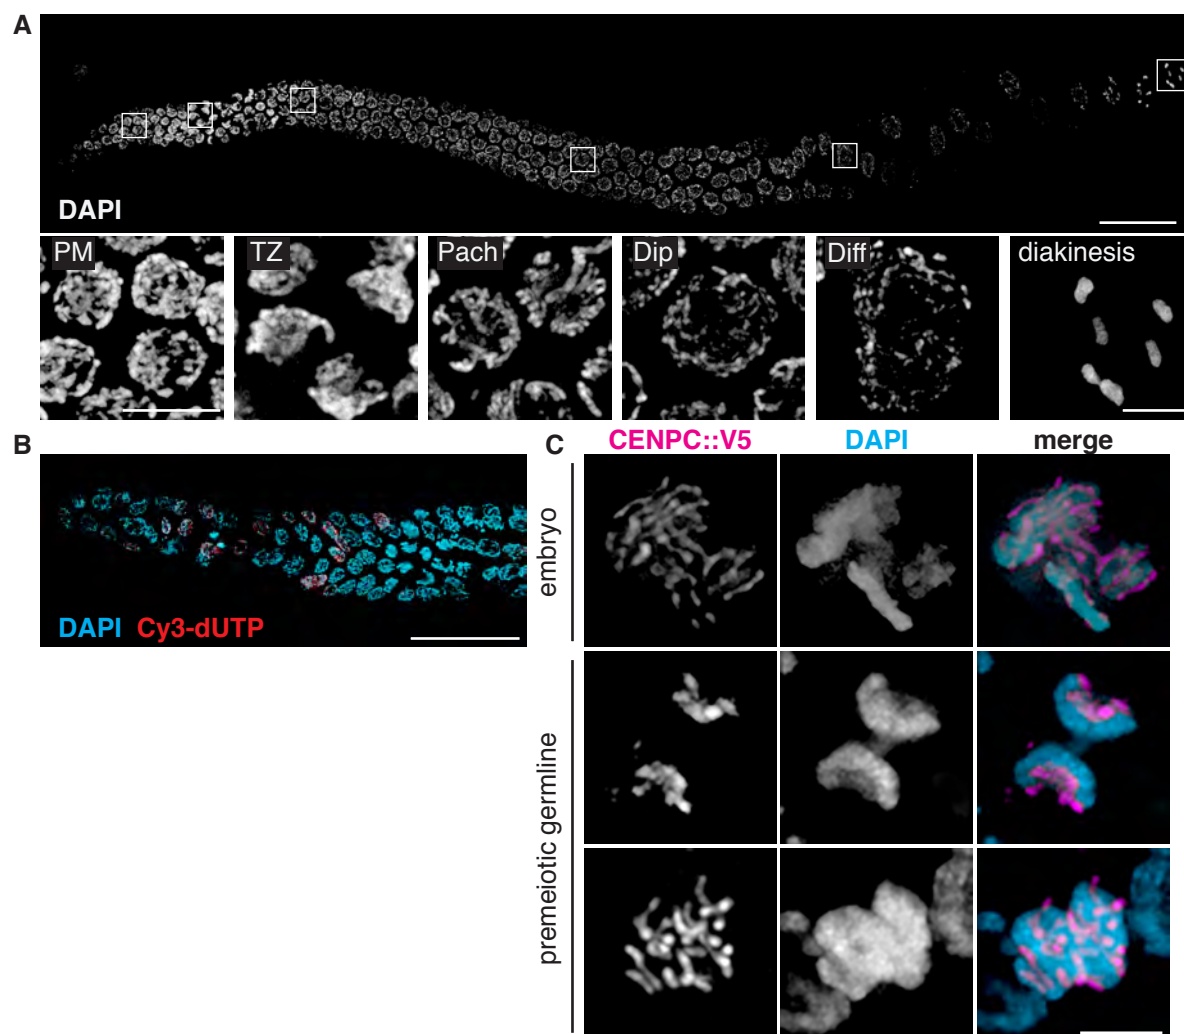



Figure 2

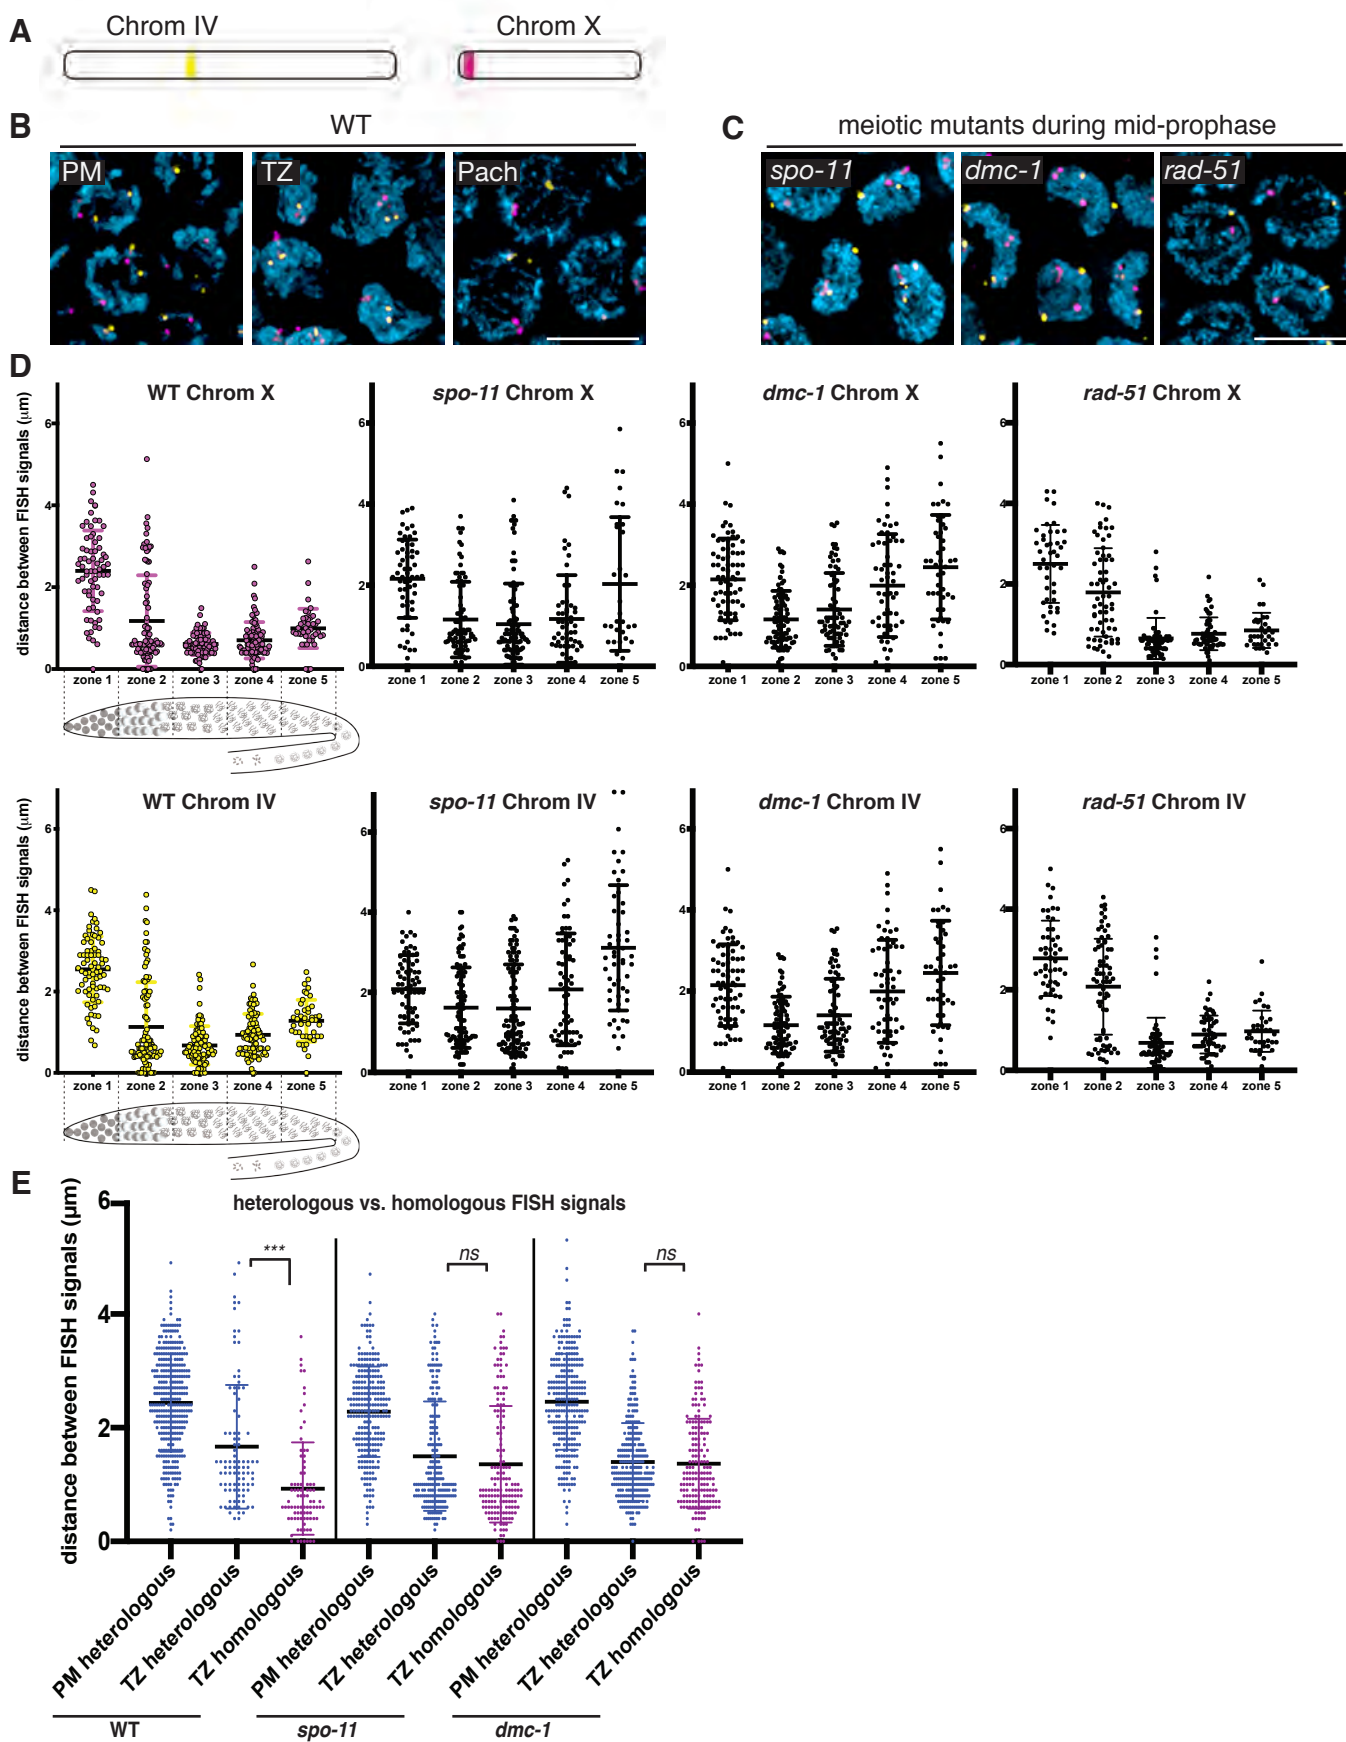

Figure 2- figure supplement 1

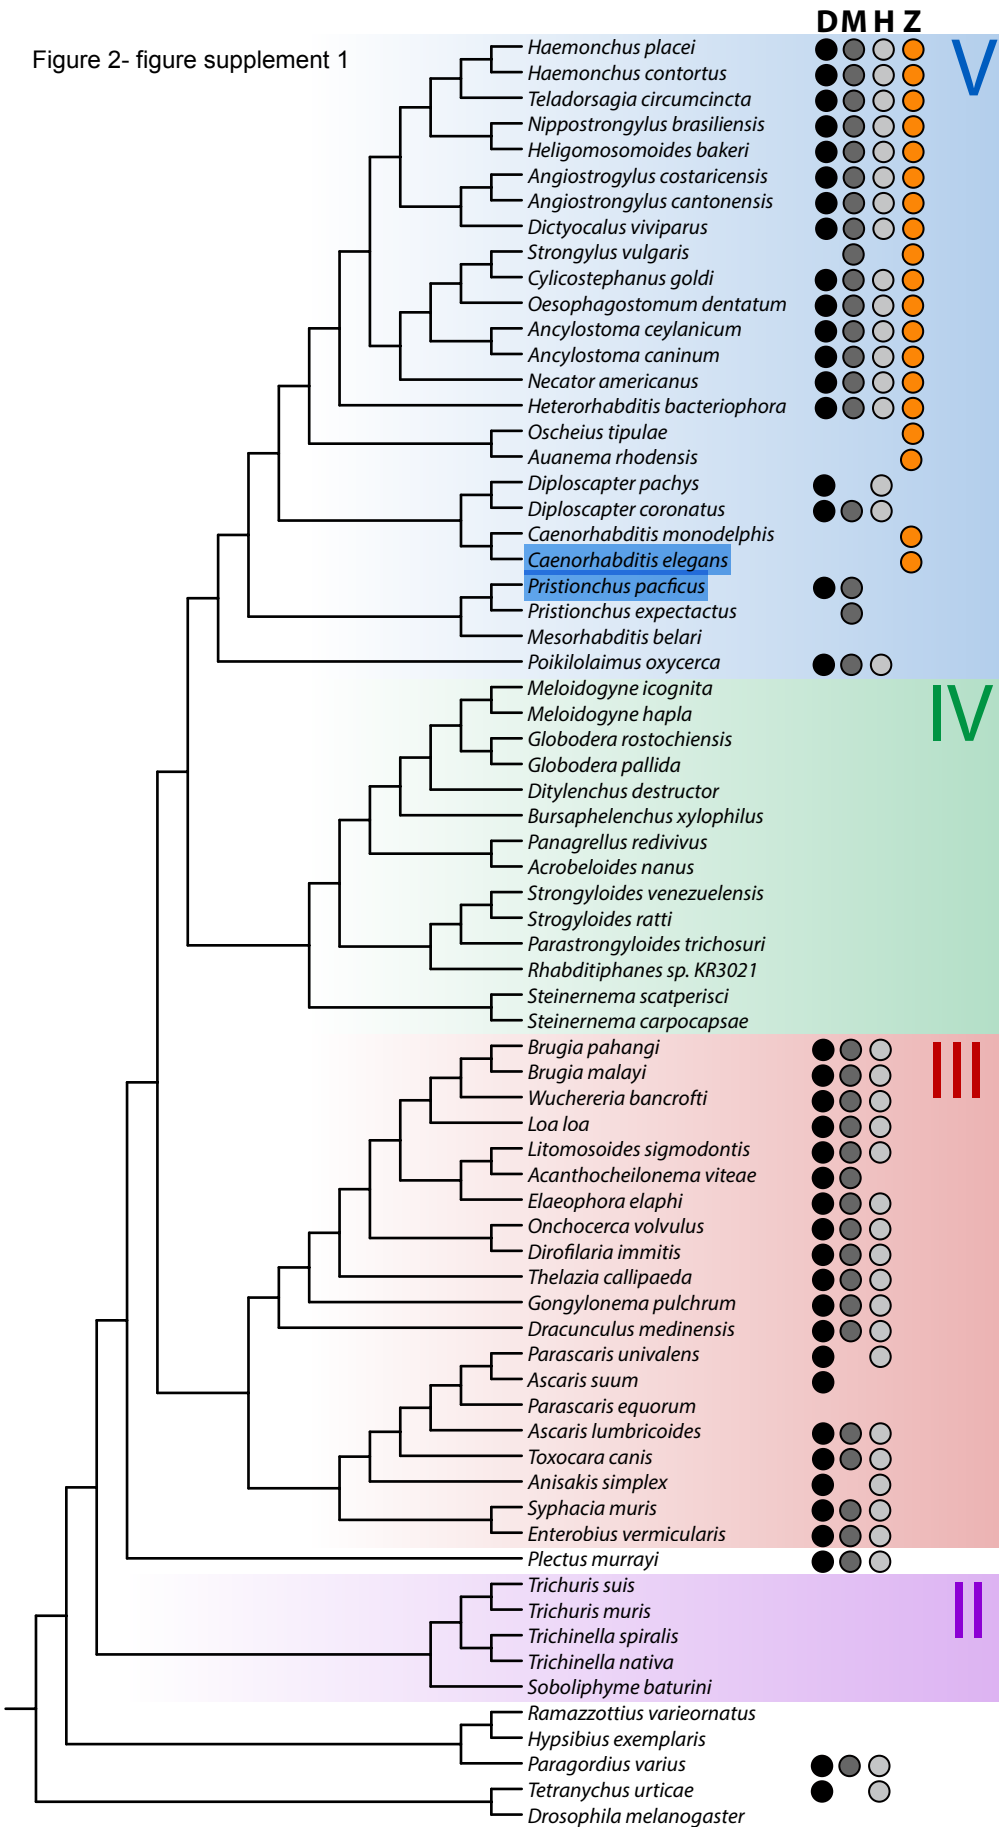

Figure 2- figure supplement 2

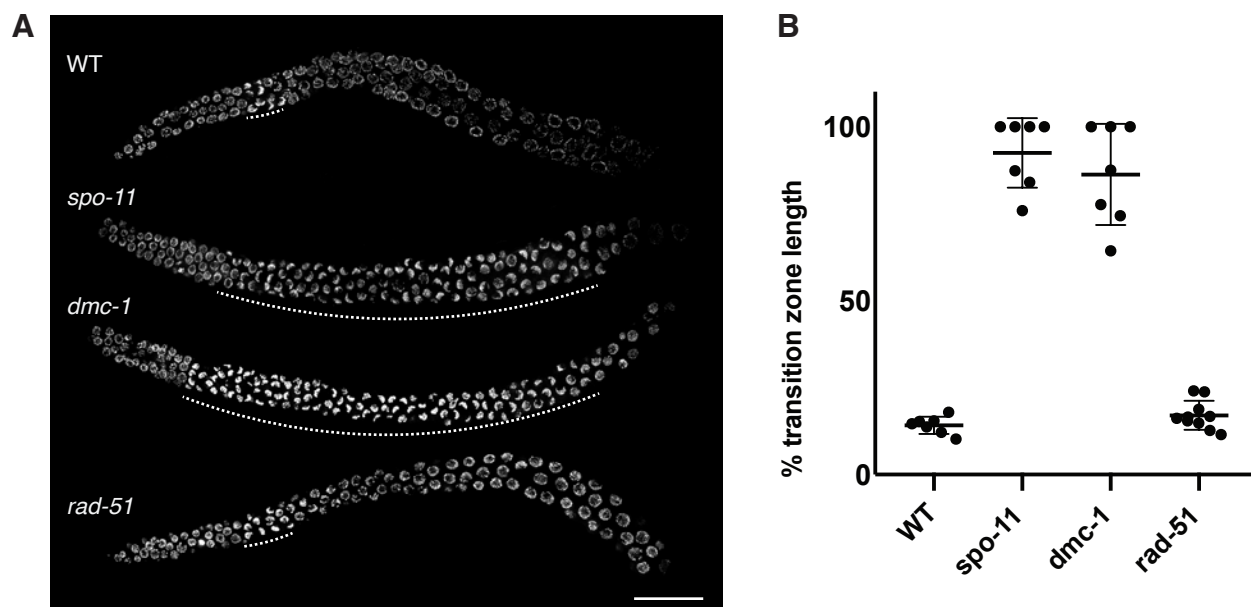

Figure 3

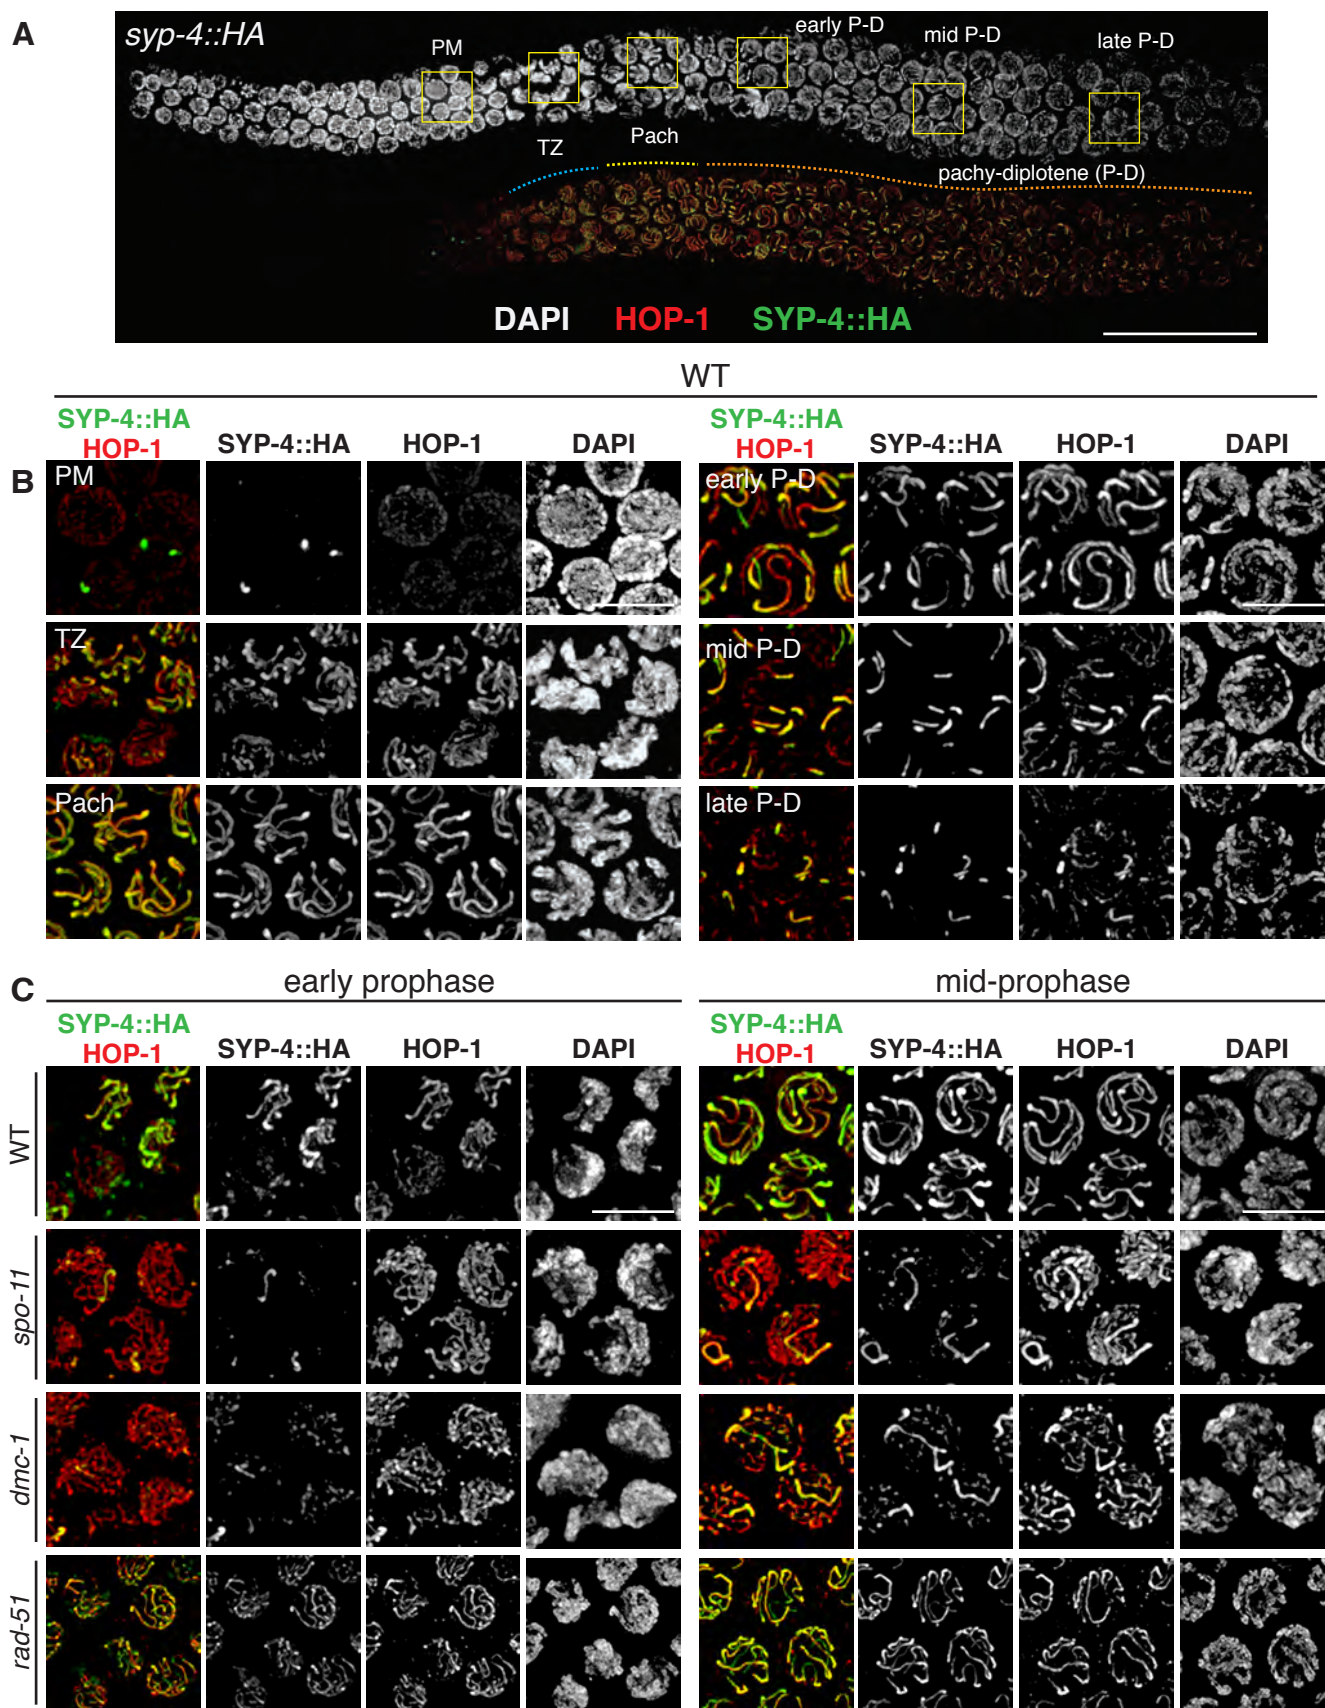

### Figure 3- figure supplement 1

| Genotype                                                                   | % Egg viability<br>( $\pm$ SD) | % Male progeny<br>( $\pm$ SD) | Eggs laid<br>( $\pm$ SD) |
|----------------------------------------------------------------------------|--------------------------------|-------------------------------|--------------------------|
| WT (n=30)                                                                  | 92.9 ( $\pm$ 16.3)             | 0.9 ( $\pm$ 1.0)              | 205 ( $\pm$ 55)          |
| <i>syp-4::HA</i> (n=7)                                                     | 97.7 ( $\pm$ 11.0)             | .5 ( $\pm$ 0.6)               | 164 ( $\pm$ 15)          |
| <i>dmc-1::V5</i> (n=8)                                                     | 95.3 ( $\pm$ 4.7)              | 1.1 ( $\pm$ 1.4)              | 170 ( $\pm$ 14)          |
| <i>syp-4::HA</i> ;<br><i>dmc-1::V5</i> ;<br><i>cosa-1::3xFLAG</i><br>(n=8) | 87.0 ( $\pm$ 10.6)             | .4 ( $\pm$ 0.6)               | 170 ( $\pm$ 37)          |

Figure 4

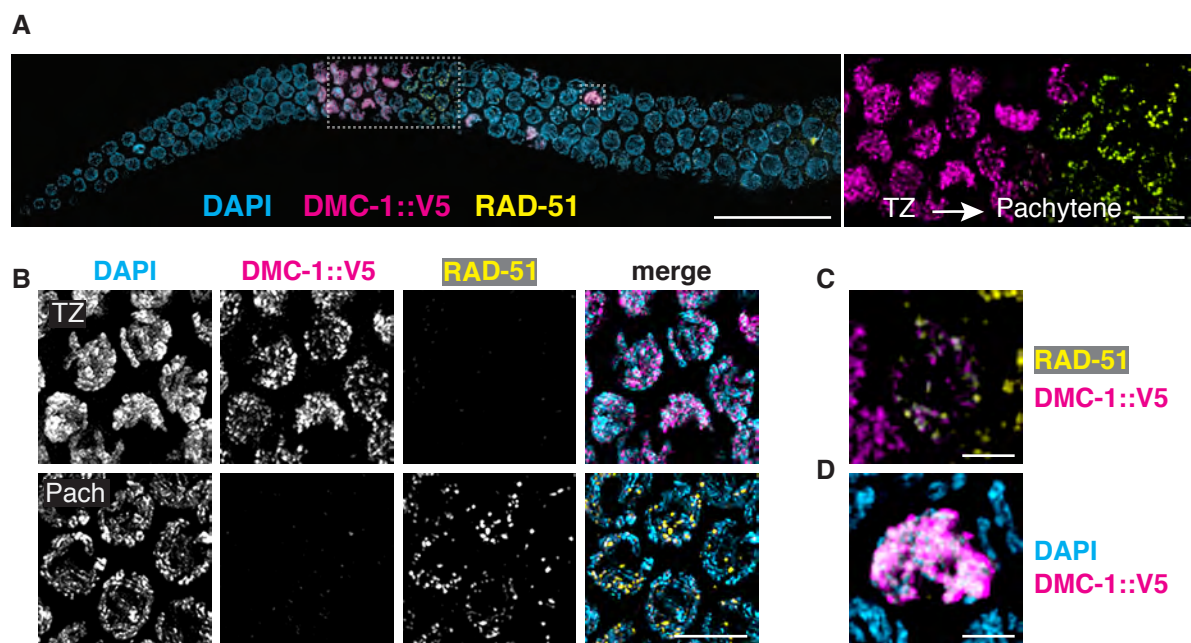

Figure 4- figure supplement 1

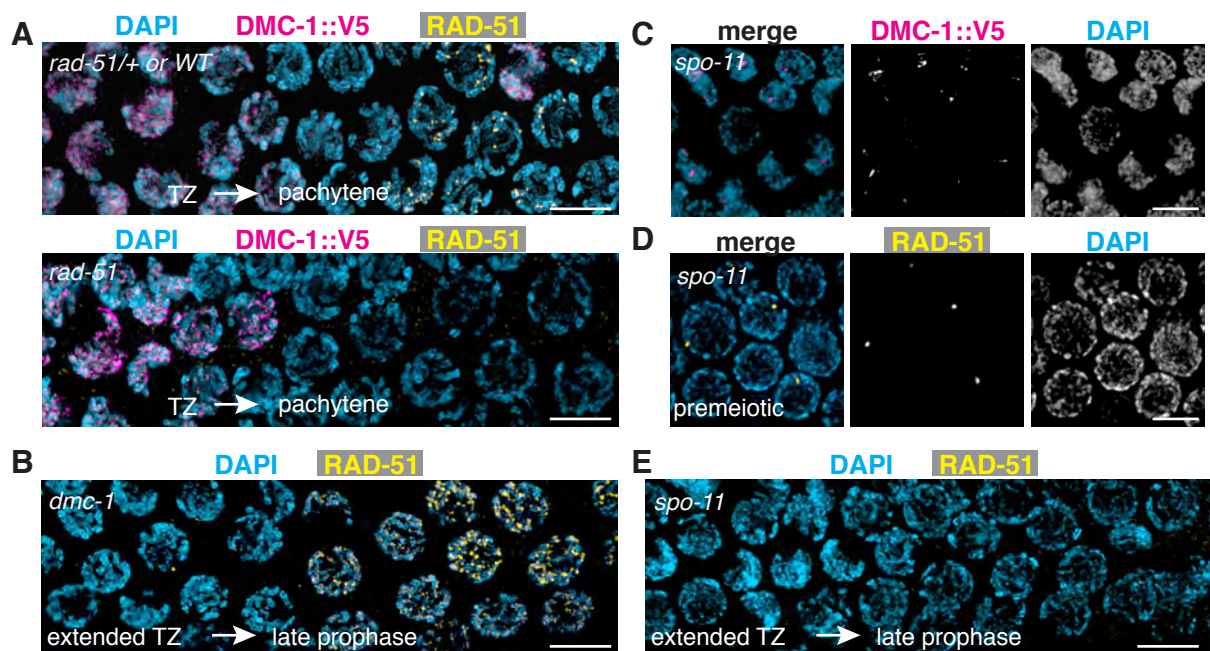

Figure 5

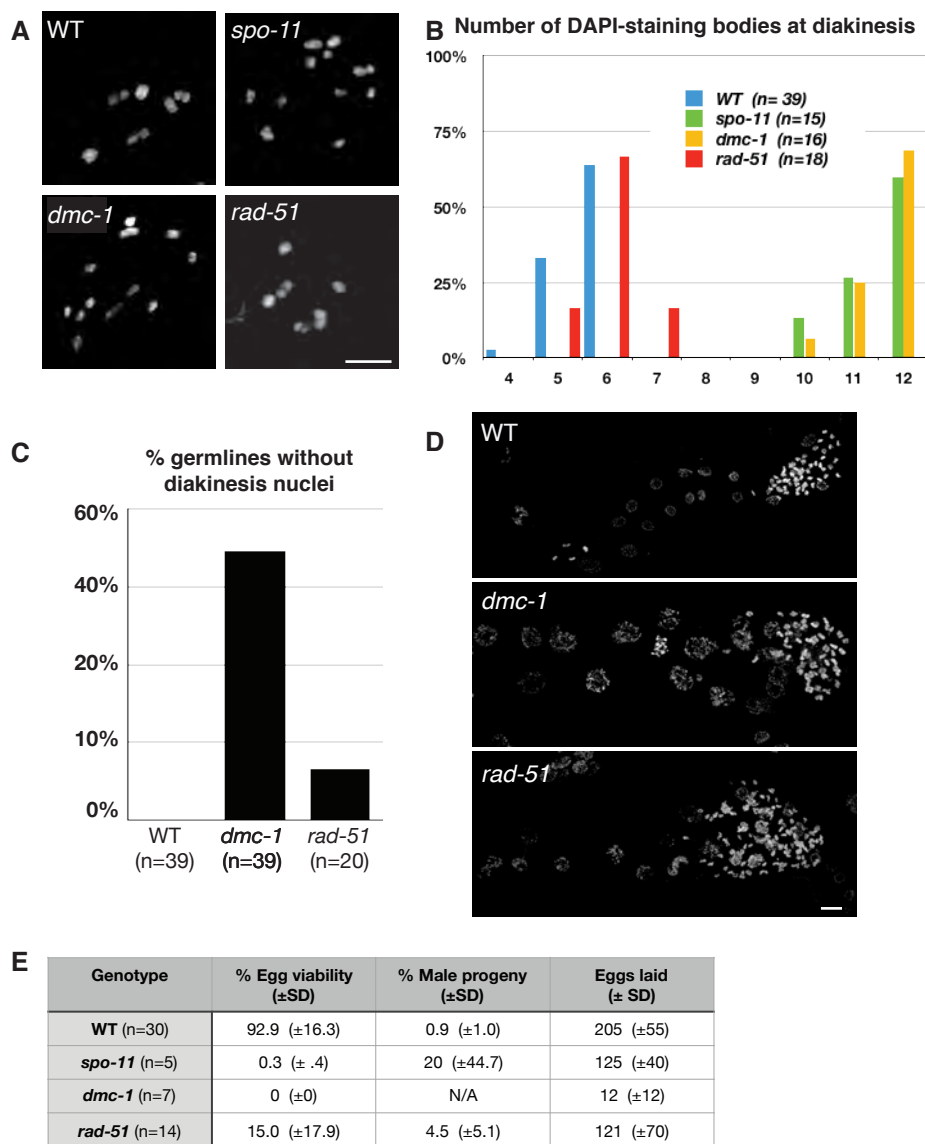



Figure 6

A

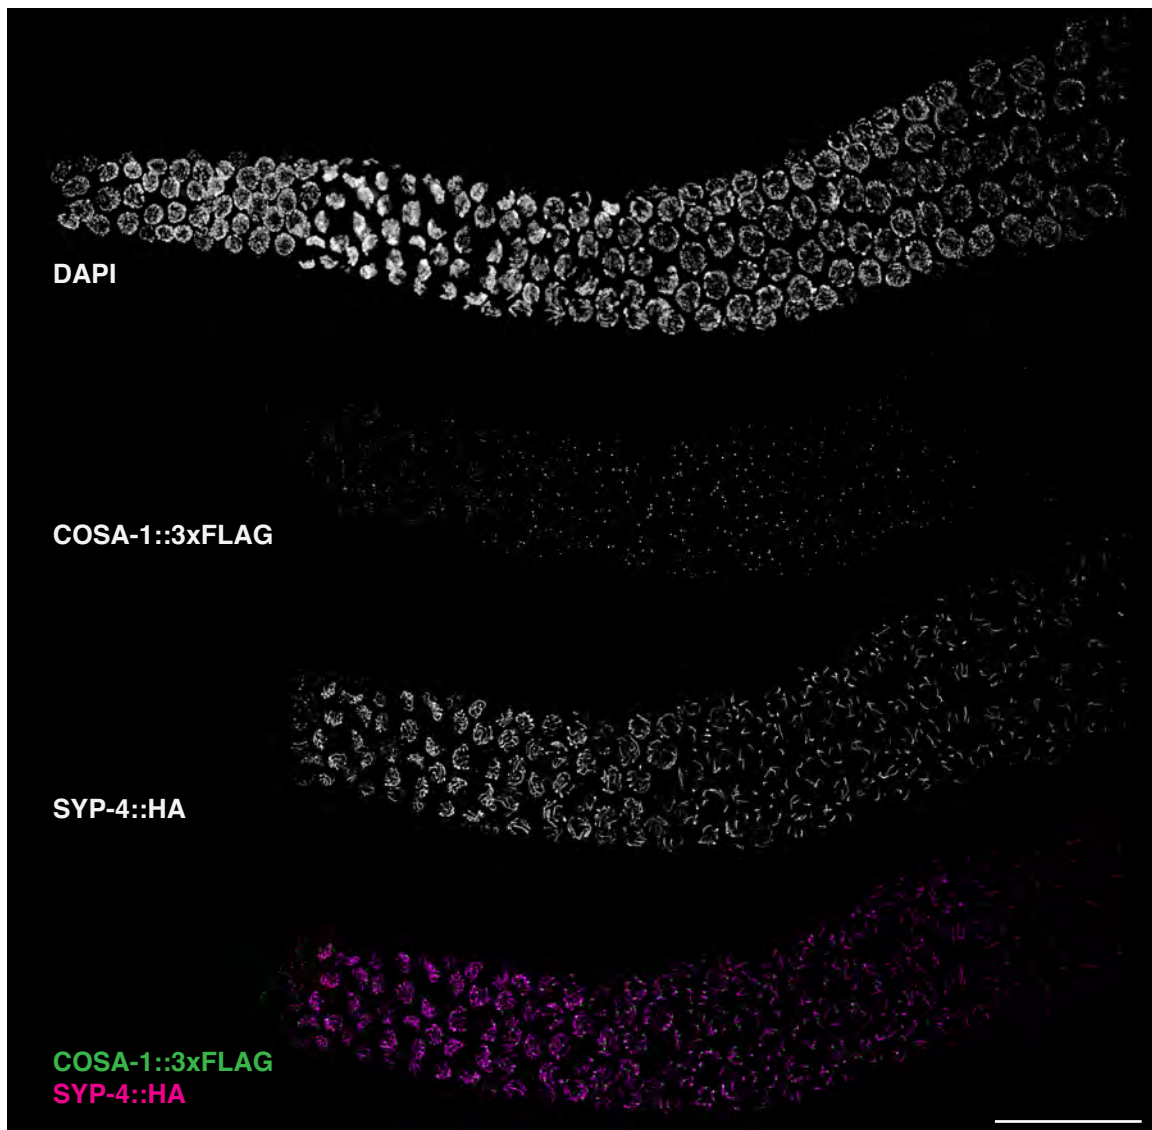

B

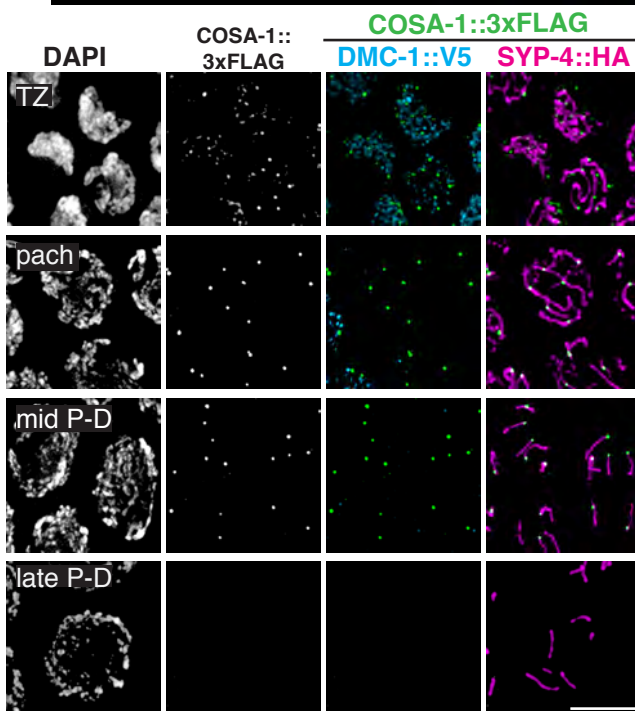

C

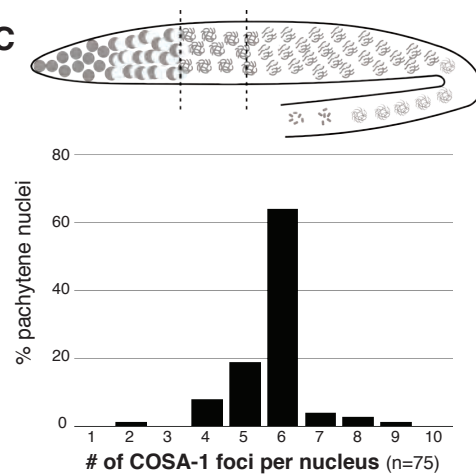

D

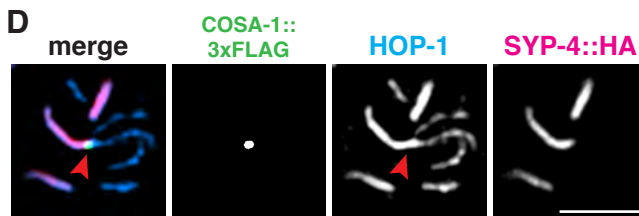

Figure 6- figure supplement 1

**A**

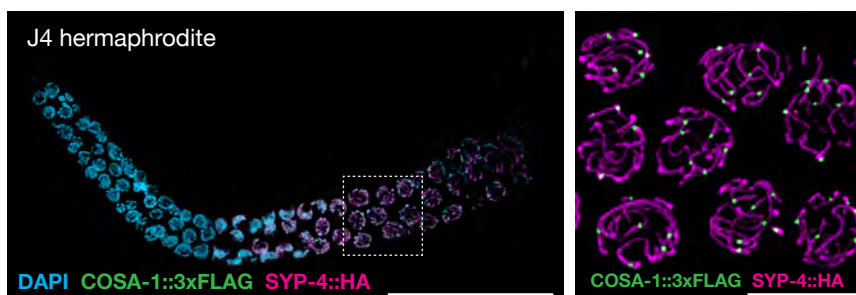

Figure 7

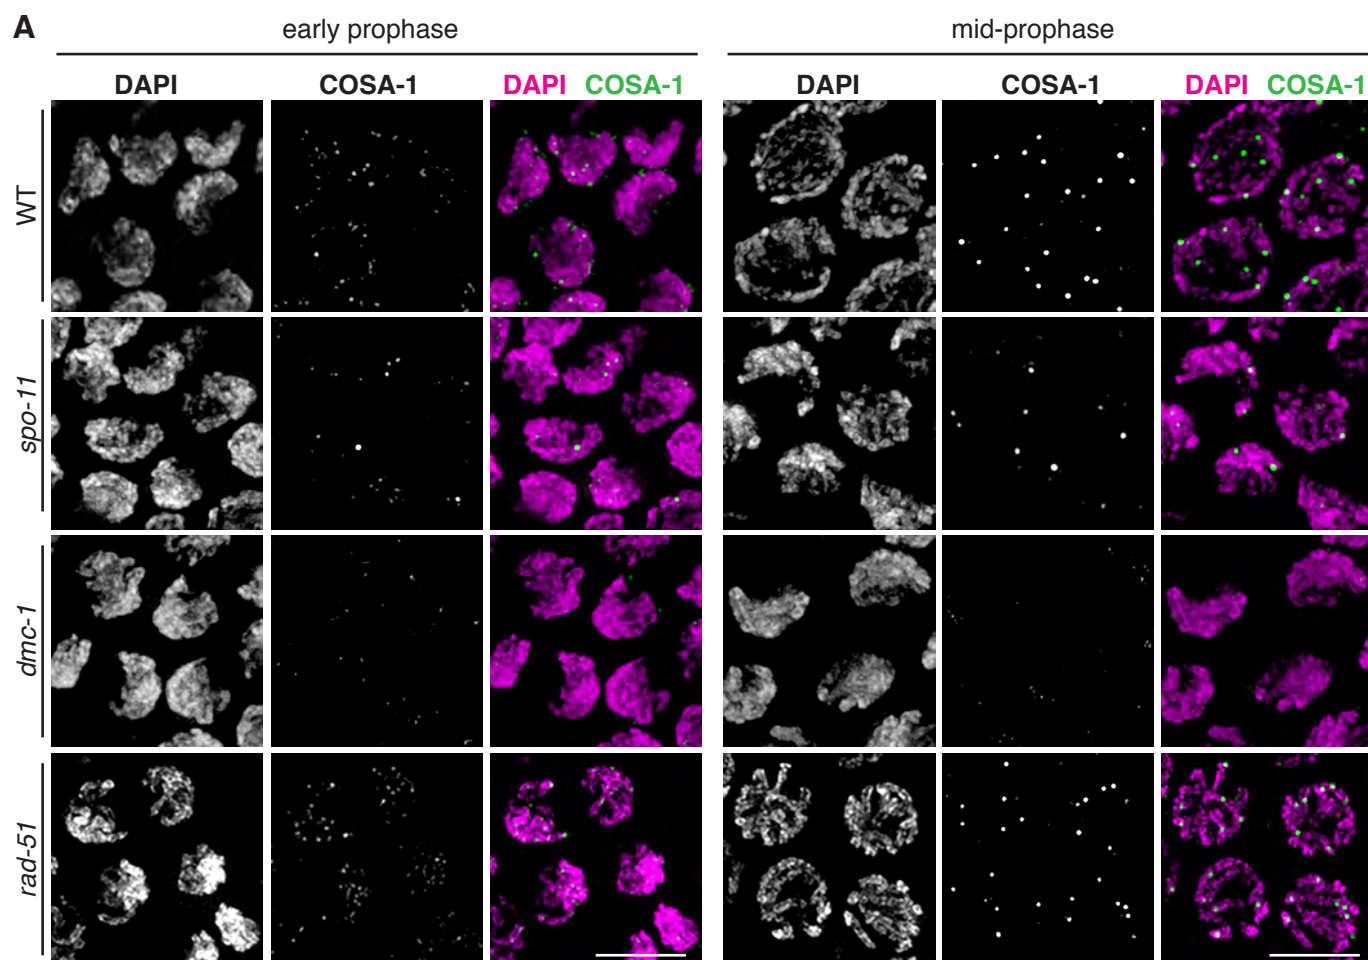

Table S1

| Strain                | El Paco genome reference, v1, 2017 | Wormbase designation | Allele        | guide RNA target sequence (PAM sequence underlined) | ssDNA template                                                                                                                                                                                                               | genotyping primer sequences                             |
|-----------------------|------------------------------------|----------------------|---------------|-----------------------------------------------------|------------------------------------------------------------------------------------------------------------------------------------------------------------------------------------------------------------------------------|---------------------------------------------------------|
| <i>cenpc::V5</i>      | <i>UMM-S71-6.7-mRNA-1</i>          | <i>PPA37734</i>      | <i>ie1007</i> | ATGAAGAGATGGATTATAGT <u>A</u><br><u>GG</u>          | GGATATTAATAAGGGGGTAAAATTGTACATCG<br>CAAAGGATGAGGAGTCATTTAATTCATCTTACTA<br>TAATCCATCTCTTCAGGTGGAGTCGAGTCCAAGA<br>AGTGGGTTTGAATTGGCTTCCAGATCCGGCT<br>CCTTCATTCTCTTCATCGAACTCTCCACTTCCTT<br>CTCCTTCTGCTCTTTTCTCTTCTTGT          | (f)TTTCTCCAGGAGTGGTTATCG<br><br>(r)ACATCGCAAAGGATGAGGAG |
| <i>cosa-1::3xflag</i> | <i>UMM-S57-3.22-mRNA-1</i>         | <i>PPA23791</i>      | <i>ie1003</i> | CTTTATTCTTCATTTTACAG <u>I</u><br><u>G</u>           | GATCATCCCAGGGAGAGAACGACCTACCCAAAC<br>AGAGATCATAGATCTAATTATCCACTGGGAGCCG<br>GATCTGATTATAAAGACCATGATGGAGACTATAAG<br>GATCACGATATTGATTACAAAGACGATGATGATAA<br>ATAAAATGAAGAATAAAGAGTATTAAATTTATGTTT<br>GTGTTCTGTTTTTGAATTACTGCTTTG | (f)ACGACCTACCCAAACAGAGA<br><br>(r)CGGATGTGGAAAGACGTACC  |
| <i>dmc-1</i> mutant   | <i>UMM-S442-1.74-mRNA-1</i>        | —                    | <i>ie1005</i> | TTCGATAAGCTGCTTGGAGG <u>I</u><br><u>GG</u>          | ATTTAATTGTAACATTCCAGACATCCAGTTGATCAA<br>CTAACCTCCGTTATTGCCTGACTTTTCGATTCCAC<br>CactagtgTCCAAGCAGCTTATCGAATTC AACACTT<br>CCAGTGGAGATTTTAAAGACTTGCTTGCGTCGT<br>GAACACACT                                                       | (f)GGACTCTCGGAGGCTAAAAGT<br><br>(r)ATTCTCGAGCATTGCTTCCT |
| <i>dmc-1::V5</i>      | <i>UMM-S442-1.74-mRNA-1</i>        | —                    | <i>ie1001</i> | GCAACGTTTTGCCATTGCAGC<br><u>AGG</u>                 | GATAAAACATGATCTTTTGTCTTCATAATTGATTA<br>GGTGGAGTCGAGTCCAAGAAGTGGGTTTGGAAAT<br>TGGCTTTCCATCCTTTGCATCGACAATTCCTCCT<br>GC <u>GGCG</u> ATGGCAAACGTTGCTTCTCAGGC<br>ATATC                                                           | (f)TGCCTGAGAACGAAGCAACG<br><br>(r)ACATGAGATGGCACAAAGGAC |
| <i>hop-1</i>          | <i>UMM-S341-6.31-mRNA-1</i>        | <i>PPA10281</i>      |               |                                                     |                                                                                                                                                                                                                              |                                                         |
| <i>rad-51</i> mutant  | <i>UMM-S442-1.74-mRNA-1</i>        | <i>PPA42255</i>      | <i>ie1006</i> | GTCGAGAACGAGGAGAATGC<br><u>CGG</u>                  | ATTTATTGGTTACCTCAAGGGACATGATGGACTG<br>GCAGGCGAGTCCGGCATACTAGTTTCTCCTCGT<br>TCTCGACATCAGCGTCGACGTGCGCCATTTGAG<br>CGGACAT                                                                                                      | (f)TTCTAGTGACGCGTGTGTT<br><br>(r)ACGAATCCTCGTTGCTGAAG   |

|                      |                      |          |               |                                 |                                                                                                                              |                                                                       |
|----------------------|----------------------|----------|---------------|---------------------------------|------------------------------------------------------------------------------------------------------------------------------|-----------------------------------------------------------------------|
| <i>spo-11</i> mutant | UMM-S230-10.9-mRNA-1 | PPA33054 | <i>ie1004</i> | ATTCAGAACTTGGCAGAGAT <u>CGG</u> | ACAAACATCTTTTTGCACGACAGGATTCTCTCAA<br>TCGATCAGTTTCCGATaactagtaCTCTGCCAAGTT<br>CTGAATATGCAAAGATGTCAAGTCAATGTGGTAA<br>GT       | (f)GGAAATCCTTCGTTCTCACTAT<br>GG<br>(r)GTCTCAATATCAGACAATTTCA<br>TTCCG |
| <i>syp-4::HA</i>     | UMM-S245-8.16-mRNA-1 | —        | <i>ie1002</i> | GGAGGAGAATTCAACTTCTT <u>CGG</u> | CAAATGGAGGTGGCGGCGGGGAGGAGGAGA<br>GTTTAATTTTTTTGGTTTTTACCCCTACGATGTCC<br>CAGATTATGCTTAAACCAATTTTTTCGAGCTTGGT<br>GTAATGTATCCA | (f)CCCGTTGATGATGCTACCAG<br>(r)GATACATTACACCAAGCTCGA<br>A              |

Table S2

| <b>Species</b>                       | <b>Prefix</b> | <b>Source</b>                                              | <b>BioProject</b> |
|--------------------------------------|---------------|------------------------------------------------------------|-------------------|
| <i>Acanthocheilonema viteae</i>      | AVITAE        | WormBase ParaSite                                          | PRJEB4306         |
| <i>Acrobeloides nanus</i>            | ANANUS        | WormBase ParaSite                                          | PRJEB26554        |
| <i>Ancylostoma caninum</i>           | ACANIN        | WormBase ParaSite                                          | PRJNA72585        |
| <i>Ancylostoma ceylanicum</i>        | ACEYLA        | WormBase ParaSite                                          | PRJNA231479       |
| <i>Angiostrongylus cantonensis</i>   | ACANTO        | WormBase ParaSite                                          | PRJEB493          |
| <i>Angiostrongylus costaricensis</i> | ACOSTA        | WormBase ParaSite                                          | PRJEB494          |
| <i>Anisakis simplex</i>              | ASIMPL        | WormBase ParaSite                                          | PRJEB496          |
| <i>Ascaris lumbricoides</i>          | ALUMBR        | WormBase ParaSite                                          | PRJEB4950         |
| <i>Ascaris suum</i>                  | ASSUUM        | WormBase ParaSite                                          | PRJNA62057        |
| <i>Auanema rhodensis</i>             | ARHODE        | -                                                          | PRJEB29492        |
| <i>Brugia malayi</i>                 | BMALAY        | WormBase ParaSite                                          | PRJNA10729        |
| <i>Brugia pahangi</i>                | BPAHAN        | WormBase ParaSite                                          | PRJEB497          |
| <i>Bursaphelenchus xylophilus</i>    | BXYLOP        | WormBase ParaSite                                          | PRJEA64437        |
| <i>Caenorhabditis elegans</i>        | CELEGA        | WormBase ParaSite                                          | PRJNA13758        |
| <i>Caenorhabditis monodelphis</i>    | CMONOD        | <a href="http://caenorhabditis.org">caenorhabditis.org</a> | PRJEB7905         |
| <i>Cylicostephanus goldi</i>         | CGOLDI        | WormBase ParaSite                                          | PRJEB498          |
| <i>Dictyocaulus viviparus</i>        | DVIVIP        | WormBase ParaSite                                          | PRJNA72587        |
| <i>Diploscapter coronatus</i>        | DCORON        | WormBase ParaSite                                          | PRJDB3143         |
| <i>Diploscapter pachys</i>           | DPACHY        | WormBase ParaSite                                          | PRJNA280107       |
| <i>Dirofilaria immitis</i>           | DIMITT        | WormBase ParaSite                                          | PRJEB1797         |
| <i>Ditylenchus destructor</i>        | DDESTR        | WormBase ParaSite                                          | PRJNA312427       |
| <i>Dracunculus medinensis</i>        | DMEDIN        | WormBase ParaSite                                          | PRJEB500          |
| <i>Drosophila melanogaster</i>       | DMELAN        | Ensembl                                                    | BDGP6             |
| <i>Elaeophora elaphi</i>             | EELAPH        | WormBase ParaSite                                          | PRJEB502          |
| <i>Enterobius vermicularis</i>       | EVERMI        | WormBase ParaSite                                          | PRJEB503          |
| <i>Globodera pallida</i>             | GPALLI        | WormBase ParaSite                                          | PRJEB123          |
| <i>Globodera rostochiensis</i>       | GROSTO        | WormBase ParaSite                                          | PRJEB13504        |
| <i>Gongylonema pulchrum</i>          | GPULCH        | WormBase ParaSite                                          | PRJEB505          |
| <i>Paragordius varius</i>            | GORDSP        | -                                                          | -                 |
| <i>Haemonchus contortus</i>          | HCONTO        | WormBase ParaSite                                          | PRJEB506          |
| <i>Haemonchus placei</i>             | HPLACE        | WormBase ParaSite                                          | PRJEB509          |
| <i>Heligmosomoides bakeri</i>        | HBAKEI        | -                                                          | PRJEB15396        |
| <i>Heterorhabditis bacteriophora</i> | HBACTE        | <a href="http://caenorhabditis.org">caenorhabditis.org</a> | PRJNA13977        |
| <i>Hypsibius exemplaris</i>          | HEXEMP        | <a href="http://tardigrades.org">tardigrades.org</a>       | PRJNA360553       |
| <i>Litomosoides sigmodontis</i>      | LSIGMO        | WormBase ParaSite                                          | PRJEB3075         |
| <i>Loa loa</i>                       | LOALOA        | WormBase ParaSite                                          | PRJNA246086       |
| <i>Meloidogyne hapla</i>             | MHAPLA        | WormBase ParaSite                                          | PRJNA29083        |
| <i>Meloidogyne incognita</i>         | MINCOG        | WormBase ParaSite                                          | PRJEA28837        |
| <i>Mesorhabditis belari</i>          | MBELAR        | <a href="http://caenorhabditis.org">caenorhabditis.org</a> | PRJEB30104        |
| <i>Necator americanus</i>            | NAMERI        | WormBase ParaSite                                          | PRJNA72135        |
| <i>Nippostrongylus brasiliensis</i>  | NBRASS        | WormBase ParaSite                                          | PRJEB511          |
| <i>Oesophagostomum dentatum</i>      | ODENTA        | WormBase ParaSite                                          | PRJNA72579        |
| <i>Onchocerca volvulus</i>           | OVOLVO        | WormBase ParaSite                                          | PRJEB513          |
| <i>Oschieus tipulae</i>              | OTIPUL        | <a href="http://caenorhabditis.org">caenorhabditis.org</a> | PRJEB15512        |
| <i>Panagrellus redivivus</i>         | PREDIV        | WormBase ParaSite                                          | PRJNA186477       |
| <i>Parascaris equorum</i>            | PEQUOR        | WormBase ParaSite                                          | PRJEB514          |
| <i>Parascaris univalens</i>          | PUNIVA        | WormBase ParaSite                                          | PRJNA386823       |
| <i>Parastrongyloides trichosuri</i>  | PTRICH        | WormBase ParaSite                                          | PRJEB515          |
| <i>Plectus murrayi</i>               | PMURRA        | <a href="http://ngenomes.org">ngenomes.org</a>             | -                 |
| <i>Poikilolaimus oxycercus</i>       | POXYCE        | <a href="http://caenorhabditis.org">caenorhabditis.org</a> | -                 |
| <i>Pristionchus exspectatus</i>      | PEXPEC        | WormBase ParaSite                                          | PRJEB6009         |
| <i>Pristionchus pacificus</i>        | PPACIF        | WormBase ParaSite                                          | PRJNA12644        |
| <i>Ramazzottius varieornatus</i>     | RVARIE        | <a href="http://tardigrades.org">tardigrades.org</a>       | PRJDB1451         |
| <i>Rhabditophanes sp. KR3021</i>     | KR3021        | WormBase ParaSite                                          | PRJEB1297         |
| <i>Soboliphyme baturini</i>          | SBATUR        | WormBase ParaSite                                          | PRJEB516          |
| <i>Steinernema carpocapsae</i>       | SCARPO        | WormBase ParaSite                                          | PRJNA202318       |
| <i>Steinernema scapterisci</i>       | SSCAPT        | WormBase ParaSite                                          | PRJNA204942       |
| <i>Strongyloides ratti</i>           | SRATTI        | WormBase ParaSite                                          | PRJEB125          |

| <b>Species</b>                     | <b>Prefix</b> | <b>Source</b>     | <b>BioProject</b> |
|------------------------------------|---------------|-------------------|-------------------|
| <i>Strongyloides venezuelensis</i> | SVENEZ        | WormBase ParaSite | PRJEB530          |
| <i>Strongylus vulgaris</i>         | SVULGA        | WormBase ParaSite | PRJEB531          |
| <i>Syphacia muris</i>              | SMURIS        | WormBase ParaSite | PRJEB524          |
| <i>Teladorsagia circumcincta</i>   | TCIRCU        | WormBase ParaSite | PRJNA72569        |
| <i>Tetranychus urticae</i>         | TURTI         | WormBase ParaSite | PRJEA71041        |
| <i>Thelazia callipaeda</i>         | TCALLI        | WormBase ParaSite | PRJEB1205         |
| <i>Toxocara canis</i>              | TCANIS        | WormBase ParaSite | PRJEB533          |
| <i>Trichinella nativa</i>          | TNATIV        | WormBase ParaSite | PRJNA179527       |
| <i>Trichinella spiralis</i>        | TSPIRA        | WormBase ParaSite | PRJNA12603        |
| <i>Trichuris muris</i>             | TRMURI        | WormBase ParaSite | PRJEB126          |
| <i>Trichuris suis</i>              | TRSUIS        | WormBase ParaSite | PRJNA179528       |
| <i>Wuchereria bancrofti</i>        | WBANCR        | WormBase ParaSite | PRJEB536          |

Table S3

| <b>Software</b> | <b>Version</b> | <b>Relevant parameters</b>                                                                                                                                                                                                                                |
|-----------------|----------------|-----------------------------------------------------------------------------------------------------------------------------------------------------------------------------------------------------------------------------------------------------------|
| catfasta2phymI  | -              | -c -f                                                                                                                                                                                                                                                     |
| edgeR           | 3.18.0         |                                                                                                                                                                                                                                                           |
| HTSeq           | 0.6.1          |                                                                                                                                                                                                                                                           |
| IQ-TREE         | 1.6.10         | <code>-bb 1000 -bb -m GTR204 G</code>                                                                                                                                                                                                                     |
| MAFFT           | 7.407          | <code>--auto</code>                                                                                                                                                                                                                                       |
| NCBI-BLAST+     | 2.5.0+         | <code>blastp</code>                                                                                                                                                                                                                                       |
| OrthoFinder     | 2.2.7          | <code>-og</code>                                                                                                                                                                                                                                          |
| PhyloTreePruner | 20150918       | <code>35 0.9 u</code>                                                                                                                                                                                                                                     |
| Priism          | 4.7.1          |                                                                                                                                                                                                                                                           |
| R               | 3.5.1          |                                                                                                                                                                                                                                                           |
| softWorx        | 7.0.0          |                                                                                                                                                                                                                                                           |
| STAR            | 2.5.2          | <code>--outFilterType BySJout --outFilterMultimapNmax 20 --alignSJoverhangMin 8 --alignSJDBoverhangMin 8 --outFilterMismatchNmax 999 --outFilterMismatchNoverReadLmax 0.04 --alignIntronMin 20 --alignIntronMax 1000000 --alignMatesGapMax 1000000</code> |
| StringTie       | 1.3.3          | <code>-p 10 -m 50 --rf -f 0.1 -a 10 -j 5 -c 2.5</code>                                                                                                                                                                                                    |
| Transdecoder    | 3.0.1          |                                                                                                                                                                                                                                                           |
| trimalAI        | v1.4.rev15     | <code>-gt 0.8 -st 0.001 -resoverlap 0.75 -seqoverlap 80</code>                                                                                                                                                                                            |

bioRxiv preprint doi: <https://doi.org/10.1101/662049>; this version posted June 5, 2019. The copyright holder for this preprint (which was not certified by peer review) is the author/funder. All rights reserved. No reuse allowed without permission.
